# Joint estimation of relatedness coefficients and allele frequencies from ancient samples.

Christoph Theunert<sup>1,2</sup>, Fernando Racimo<sup>3</sup> and Montgomery Slatkin<sup>1</sup>

<sup>1</sup>Department of Integrative Biology, University of California, Berkeley

<sup>2</sup>Department of Evolutionary Genetics, Max-Planck Institute for Evolutionary Anthropology, Leipzig, Germany

<sup>3</sup>New York Genome Center, New York, NY 10013

January 27, 2017

## Abstract

We develop and test a method to address whether DNA samples sequenced from a group of fossil hominin bone or teeth fragments originate from the same individual or from closely related individuals. Our method assumes low amounts of retrievable DNA, significant levels of sequencing error and contamination from one or more present-day humans. We develop and implement a maximum likelihood method that estimates levels of contamination, sequencing error rates and pairwise relatedness coefficients in a set of individuals. We assume there is no reference panel for the ancient population to provide allele and haplotype frequencies. Our approach makes use of single nucleotide polymorphisms and does not make assumptions about the underlying demographic model. By artificially mating individual genomes from the 1000 Genomes Project, we determine the numbers of individuals at a given genomic coverage that are required to detect different levels of genetic relatedness with confidence.

## Introduction

Over the past few years the amount of ancient DNA (aDNA) recovered from fossilized bones, teeth and hair has grown rapidly [12], [16], [10]. Despite significant advances in se-

quencing technology, laboratory practices and computational methods, problems still arise because of low amounts of endogenous nuclear DNA, short degraded fragments, contamination from present-day humans and sequencing error. Nevertheless, data from ancient remains are a precious source of information, providing insights about the history of humans and their closest relatives that are unavailable from any other source. DNA from several ancient individuals found in the same location are especially important because they can provide clues about relatedness within groups. This information is valuable for downstream analyses which make assumptions about relatedness among individuals.

In sexually reproducing species, the coefficient of relatedness ( $r$ ) is twice the probability that two sites sampled at random from autosomes (one from each individual) are identical by descent (IBD). With that definition,  $r = 1$  for two samples from the same individual or from monozygotic twins,  $r = 1/2$  for first-degree relatives (parents and offspring or full siblings),  $r = 1/4$  for second-degree relatives (aunt or uncle and nephew or niece, half siblings, grandparent and grandchild, or double first cousins), etc.

Information about the genetic relatedness between individuals is of significance in the fields of forensic sciences, agriculture, human genetics and ecological sciences. A variety of approaches have been developed to infer relatedness, each suited to specific types of data. For a comprehensive review on statistical methods and available approaches see [20] and [17]. The general concept underlying relatedness analyses is that of IBD, but this quantity cannot be observed directly in data. Instead allelic states at a particular locus are used to make inferences about IBD and relatedness. When good quality, high-coverage genomes from individuals are available, inferring relatedness is relatively easy and many methods have been developed (for example [11], [13], [19], [4], [2], [7]). However, for ancient DNA, the quality and amount of data are often sufficiently limited that existing methods cannot be applied.

There have been some attempts to deal with the problems posed by ancient DNA. For example, Vohr et al. developed an approach to identify whether two DNA samples with extremely low coverage originate from the same or different individuals [18]. The

48 authors introduced a likelihood method that uses information from single nucleotide poly-  
 49 morphisms (SNPs) and patterns of linkage disequilibrium. However, this method relies on  
 50 a reference panel of phased haplotypes from the same population in order to infer allele  
 51 and haplotype frequencies. This method can be used for human fossils that are sufficiently  
 52 recent that a present-day population can be used as a reference panel. However, for older  
 53 human fossils and for Neanderthals and Denisovans, no reference panels are yet available.

54  
 55 In another recent study, Martin and Slatkin [9] presented a method to infer close  
 56 genetic relatedness using low-coverage next generation sequencing (NGS) samples from  
 57 ancient individuals. They did not assume a reference panel is available and they account  
 58 for contamination from modern humans and sequencing error. Their method investigates  
 59 the overlap of pairwise genetic distance distributions calculated under certain realistic sce-  
 60 narios to identify the relatedness between pairs of individuals.

61  
 62 In this study we extend the work of [9] by using a maximum likelihood framework  
 63 applied to each polymorphic site and determine whether this approach provides improved  
 64 accuracy. In addition to inferring relatedness, our method provides estimates of allele  
 65 frequencies and contamination levels for each sample. By artificially mating individual  
 66 sequences from the publicly available 1000 Genomes Project we determine the number of  
 67 individuals at a given genomic coverage that are required to distinguish different levels of  
 68 genetic relatedness.

## 69 **Methods**

### 70 **Model notation**

71 The relatedness  $r$  of two individuals is twice the probability of identity by descent of two  
 72 chromosomes chosen at random. Individuals are denoted by  $i, j = 1, 2, \dots, N$  and sites are  
 73 denoted by  $k = 1, 2, \dots, L$ . We further assume the sequencing error rate  $e$  is the same  
 74 for every site  $k$  in every sequence.  $e$  is the probability that a site is misread during the  
 75 sequencing, if it is misread at a site that is actually monomorphic then it creates a false  
 76 SNP, but if it is misread at a site that is actually polymorphic then it is misread as the

77 alternative allele. The contamination rate for an ancient individual  $i$  is  $C_i$ .  $C_i$  is the prob-  
 78 ability that a randomly chosen read from an individual  $i$  is derived from a present day  
 79 human. The average contamination rate over all sequenced ancient individuals is denoted  
 80  $\bar{C}$ . We use only sites that are polymorphic in the contaminant panel and we will assume  
 81 that we observe only ancestral or derived (non-chimpanzee) alleles at every site, thereby  
 82 ignoring triallelic sites.

83

84 Furthermore, let  $f_k$  be the derived allele frequency (*daf*) at site  $k$  in the putative  
 85 contaminating population (e.g. modern humans). The observed *daf* at site  $k$  in the  
 86 ancient samples is  $q_k$  and is a weighted average of the endogenous and contaminating  
 87 allele frequencies:

$$q_k = (1 - \bar{C})p_k + \bar{C}f_k \quad (1)$$

88 where  $p_k$  is the endogenous *daf* at site  $k$  in the ancient samples (unobservable because  
 89 the alleles sequenced at a site might either be endogenous or from the contaminating  
 90 population). We use  $\bar{C}$  because it is in principle impossible to determine which of the reads  
 91 at a given site comes from the contaminating population. Therefore, our best estimate of  
 92  $p_k$  is:

$$p_k = \frac{q_k - \bar{C}f_k}{1 - \bar{C}}. \quad (2)$$

93 Summarizing, the model input parameters are the allelic (ancestral/derived) states  
 94 at each site from each of the ancient reads. The observed parameter is  $q_k$ .  $f_k$  is the  
 95 only parameter used from a contaminating reference dataset. The more individuals that  
 96 are available in the contaminating reference dataset the closer these values approach true  
 97 population frequencies resulting in more accurate parameter estimates. A parameter that  
 98 cannot be directly observed from the ancient data is  $p_k$ , but it is calculated at each step  
 99 based on  $q_k$ ,  $f_k$  and  $\bar{C}$ . The parameters that we will aim to estimate are the relatedness  
 100 coefficient for each pair of individuals  $r_{i,j}$ , the contamination rate for each individual  $C_i$   
 101 and the overall sequencing error rate  $e$ .

102

103 For a pair of individuals  $i$  and  $j$  with relatedness  $r_{i,j}$ , there are three sets of parameters  
 104 that need to be modeled.

105 (1) Endogenous frequencies - the probabilities of allelic configurations 11,10,01,00 in  
 106 the ancient DNA (1 being derived, 0 being ancestral):

107

$$\begin{aligned} P_{11} &= \left(1 - \frac{r}{2}\right) p_k^2 + \frac{r}{2} p_k \\ P_{01} &= P_{10} = \left(1 - \frac{r}{2}\right) p_k (1 - p_k) \\ P_{00} &= \left(1 - \frac{r}{2}\right) (1 - p_k)^2 + \frac{r}{2} (1 - p_k) \end{aligned} \quad (3)$$

108 (2) Contaminated frequencies - the probabilities of allelic configurations in the con-  
 109 taminated sample:

110

$$\begin{aligned} Q_{11} &= (1 - C_i)(1 - C_j)P_{11} + [C_i(1 - C_j) + C_j(1 - C_i)] p_k f_k + C_i C_j f_k^2 \\ Q_{10} &= (1 - C_i)(1 - C_j)P_{10} + C_i(1 - C_j)(1 - p_k) f_k + C_j(1 - C_i) p_k (1 - f_k) + C_i C_j f_k (1 - f_k) \\ Q_{01} &= (1 - C_i)(1 - C_j)P_{01} + C_i(1 - C_j) p_k (1 - f_k) + C_j(1 - C_i)(1 - p_k) f_k + C_i C_j f_k (1 - f_k) \\ Q_{00} &= (1 - C_i)(1 - C_j)P_{00} + [C_i(1 - C_j) + C_j(1 - C_i)] (1 - p_k)(1 - f_k) + C_i C_j (1 - f_k)^2 \end{aligned} \quad (4)$$

111 (3) Sequenced frequencies - the probabilities of allelic configurations in the sequences  
 112 themselves, allowing for sequencing error:

113

$$\begin{aligned} R_{11} &= (1 - e)^2 Q_{11} + e(1 - e)(Q_{10} + Q_{01}) + e^2 Q_{00} \\ R_{10} &= (1 - e)^2 Q_{10} + e(1 - e)(Q_{11} + Q_{00}) + e^2 Q_{01} \\ R_{01} &= (1 - e)^2 Q_{01} + e(1 - e)(Q_{11} + Q_{00}) + e^2 Q_{10} \\ R_{00} &= (1 - e)^2 Q_{00} + e(1 - e)(Q_{10} + Q_{01}) + e^2 Q_{11} \end{aligned} \quad (5)$$

## 114 Parameter estimation

115 Assume a dataset of  $N$  ancient individuals and  $L$  aligned sites. For each pair of in-  
116 dividuals  $i$  and  $j$  (out of  $N(N - 1)/2$  total pairs) the log likelihood is calculated as  
117  $lk_{i,j} = \sum_{k=1}^L \log(R_k)$ . The log likelihood for the entire dataset is then the sum over  
118 all log likelihoods  $lk_{i,j}$  for all pairs of individuals. We refer to this approach as the “com-  
119 plete method”.

120

121 Overall the number of values that need to be estimated are  $N(N - 1)/2$  parameters  
122 for the relatedness coefficients  $r_{i,j}$ ,  $N$  parameters for contamination rates  $C_i$  and one pa-  
123 rameter for the sequencing error rate  $e$ . A method to maximize the log-likelihood of these  
124 input parameters is implemented in C++ using the non-linear optimization routine *L-*  
125 *BFGS* from the dlib C++ library [5]. The software package we generated will be made  
126 available online. Lower and upper bounds for the parameters  $r$ ,  $C$  and  $e$  are set to  $[0.001,$   
127  $0.9999]$   $[0.0, 0.25]$  and  $[0.001, 0.25]$  respectively.

128

129 As mentioned in the results, a slightly different procedure of using only a subset of  
130 all available individuals to calculate the likelihood for the entire dataset was tested. In  
131 this case  $n < N$  individuals are used to calculate the overall likelihood as the sum over  
132  $n(n - 1)/2$  likelihoods  $lk_{i,j}$ . For example, if one is only interested in a certain pair of  
133 individuals  $i$  and  $j$ , then  $n = 2$  and only one  $r_{i,j}$  needs to be estimated. However,  $q_k$  at  
134 site  $k$  is still estimated using all  $N$  individuals. Depending on the actual value of  $n$  this  
135 approach may result in faster computation times. We refer to this approach as the “subset  
136 method”.

137

138 We simulated 50 independent datasets for each combination of  $N$ ,  $L$  and  $r$  and sepa-  
139 rately performed the parameter estimation for each of them. Therefore, the final estimates  
140 of  $r$  are given as an average, and the accuracy of our method is evaluated by the root-  
141 mean-square error (*rmse*) and the mean absolute error (*mae*). When used together, *rmse*  
142 and *mae* can characterize the errors in a set of forecasts. The magnitude of the difference  
143 between them is informative about the amount of variance in the individual errors in the

144 sample.

145

## 146 Simulations

147 For the initial evaluation of the model we generated sets of  $2N$  sequences of length  $L$   
148 sites. For each sequence, alleles at each position  $k$  were either derived (1) with proba-  
149 bility  $P_k$  or ancestral (0) with probability  $(1 - P_k)$ , where  $P_k$  was randomly drawn from  
150  $U[0, 1]$ . In order to generate contaminated reads from our simulated genotypes we adopt a  
151 method used in [14]. For each simulated individual  $i$ , the number of derived and ancestral  
152 fragments at a particular site follows a binomial distribution that depends on the true  
153 ancient genotype, the sequencing error rate and the contamination rate  $C_i$  (see equations  
154 3-6 in [14]). Contamination rate  $C_i$  for individual  $i$  was randomly drawn from a uniform  
155 distribution between 2% and 25% separately for each simulation (i.e. in each simulation  
156 individuals have different rates of contamination  $C_i$ ). Sequencing error rate  $e$  was set to  
157 0.001 throughout all simulations. To systematically study the behavior of our method we  
158 assume one read per individual at each simulated genomic position. We further assume  
159  $f_k$  for each site from a putative reference panel to be randomly drawn from  $U[0, 1]$ .

160 Furthermore, we simulated a scenario where reads are only available from a random  
161 subset of individuals (out of a total of  $N$ ) at each genomic site. Supplementary tables 3  
162 and 4 summarize the results.

163

164 To ensure the simulation method mentioned above does not introduce any biases we  
165 carried out simulations where we artificially mated unrelated European (EUR) sequences  
166 from the 1000 Genomes Project Phase 3 [1]. A similar approach was introduced in [9].  
167 We focused on phased genomes and extracted all biallelic polymorphic sites from single  
168 chromosomes from EUR individuals. Contamination from a putative contaminant panel  
169 was implemented in the same way as described before. We restricted our analyses to SNPs  
170 that passed the basic 1000 Genomes Project filtering criteria and for which ancestral allele  
171 information was available. The ancestral states were determined by using information  
172 from the inferred human-chimpanzee ancestor at each site. We filtered sites with a Map20  
173  $< 1$  (Duke uniqueness tracks of 20bp) and we removed deletions and insertions. The

method behaves exactly the same for both datasets (simulated sequences and sequences from the 1000 Genomes Project).

In both cases, we performed artificial meioses of pairs of individuals for single chromosomes. The recombination rate was assumed to be uniform along the genome and set to be  $1.310^{-8}$  per bp per generation [6],[12]. We implemented a minimal number of one recombination event per chromosome per generation. Relatedness among individuals was then simulated by artificially mating them with other individuals to produce offspring.

To investigate the effect of different types of genomic sites, we analyzed each dataset (not the present-day reference panel) filtered for 1) fixed and polymorphic sites 2) only polymorphic sites and 3) polymorphic sites that were either changed to being fixed or remained polymorphic after allowing for contamination and sequencing error. This way, we could study the effect of different classes of sites on the accuracy of our estimates.

## Simulated pedigrees

Three different pedigrees (denoted  $f1$ ,  $f2$  and  $f3$ ) were generated with the mating method described above:

- $f1$ : father + mother = child
- $f2$ : father + mother = child1; child1 + X0 = child2
- $f3$ : father + mother = child1; father + mother = child2; child1 + X1 = child3; child2 + X2 = child4

where X0, X1 and X2 represent unrelated partner individuals. Throughout the manuscript each dataset is further represented by an additional number which denotes the absence (.0) or presence (.1) of contamination and sequencing error (e.g.  $f2.1$  is the second pedigree  $f2$  with contamination and error). In each dataset all remaining individuals were kept unrelated. The very last individual in each dataset is a direct copy of another individual before contamination and error. This allows us to test the method for different degrees of relatedness:  $r = 0.5$  in  $f1$ ;  $r = 0.5$  and  $r = 0.25$  in  $f2$ ;  $r = 0.5$ ,  $r = 0.25$  and  $r = 0.125$  in



202 f3; and  $r = 1.0$  in all three.

203

## 204 Results

### 205 Accuracy when $C_i = 0$ and $e = 0$

206 First we studied the accuracy of our method to identify genetic relatedness simulated in  
207 pedigree *f1.0* in the absence of contamination and sequencing error by using the subset  
208 approach with  $n = 2$ .

209 In figure 1 each subfigure of boxplots represents a different combination of  $N$  individuals  
210 (rows) and  $L$  sites (columns) and shows the distribution of  $r$  for a pair of related individuals  
211 over 50 independent datasets (see supplementary figure SF1 for more details and error  
212 values). Note that we refer to the true simulated relatedness coefficient as  $r_s$ , the point  
213 estimates of it as  $r$  and the estimated average over 50 independent datasets as  $\bar{r}$ .

214 For example in the upper right corner we simulated reads for 202 diploid individuals  
215 and 100,000 overlapping polymorphic sites. For the two individuals that result from the  
216 same individual ( $r_s = 1.0$ ), estimates are  $\bar{r} = 1.0$  with  $\text{rmse} = 0.01$  and  $\text{mae} = 0.01$ . In  
217 the same dataset for a pair of parent-offspring individuals ( $r_s = 0.5$ ),  $\bar{r}$  is 0.49 with  $\text{rmse}$   
218  $= 0.01$  and  $\text{mae} = 0.01$ .

219

220 The variation of the parameter estimates is given in more detail in supplementary fig-  
221 ure SF2 showing that the range in estimates for this dataset is rather small (for  $r_s = 1.0$ :  
222  $r = [0.98, 1.01]$ ; for  $r_s = 0.5$ :  $r = [0.47, 0.49]$ ). We note here that values of  $r > 1$  are  
223 possible as the final step of the parameter inference is  $r_{i,j} = r_{i,j}/1 - (\text{mean}(C_i, C_j))$ . In  
224 the majority of cases the method underestimates the value of  $r_s$ . As expected, the fewer  
225 overlapping sites and individuals that are available, the more the estimates deviate from  
226 the true value of  $r_s$  and the higher the error estimates become. For example for  $N = 17$   
227 and  $L = 1,000$ ,  $\bar{r}$  is 0.94 with  $\text{rmse} = 0.11$ ,  $\text{mae} = 0.09$  (for  $r_s = 1.0$ ); and  $\bar{r} = 0.32$  with  
228  $\text{rmse} = 0.2$  and  $\text{mae} = 0.18$  (for  $r_s = 0.5$ ). It is worth mentioning that the distribution of  
229 estimates for different  $r_s$  do not overlap with each other in any of the datasets.

230

Supplementary figure SF3 shows the comparison of estimated and simulated contamination rates for each related individual with the rmse shown in the legend of each graph (note that the true  $C_i = 0$ ). The method overestimates the contamination rates, but the majority of  $C_i$  is estimated to be  $< 0.05$  when the number of individuals and sites increase.

The accuracy of the method to identify relatedness coefficients from pedigree *f2.0* is presented in figure 2. Again, with reads from 202 individuals and  $L > 1,000$  the results are highly accurate and simulated  $r_s = 0.5$  as well as second degree relatedness  $r_s = 0.25$  are estimated to be  $\bar{r} = 0.48$  and  $\bar{r} = 0.23$ , respectively (see supplementary figure SF4 for more details and error values).

As expected, the smaller N and L, the less accurate results become, e.g.  $\bar{r} = 0.15$  and error estimates around 0.10 for  $r_s = 0.25$  when  $N = 48$  and  $L = 10,000$ . Furthermore, with  $N = 18$  the method does not pick up the signal of  $r_s = 0.25$  anymore. Although for more distantly related individuals parameter inference may be less accurate, distributions of estimates do not overlap and so provide valuable information about differences in relatedness (see supplementary figures SF5 and SF6).

Identifying a relatedness of  $r_s = 0.125$  from dataset *f3.0* is even more difficult. Shown in supplementary figures SF7, SF8 and SF9 are estimates for  $r_s = 0.125$ . It can be seen that only with reads from 205 individuals results are rather accurate at  $\bar{r} = 0.09$  and errors of around 0.03.

## Accuracy when $C > 0$ and $e > 0$

Under a more realistic scenario, contamination from modern humans and sequencing error may create bias. Therefore we tested the method on simulated datasets that are affected by these factors. As described before, each  $C_i$  is drawn from  $U [0.02, 0.25]$  and  $e$  is set to 0.001 for all datasets.

Summarizing the information for pedigree *f1.1* from figures 3, 4, SF10 and SF11 the observations are similar to what we reported before but  $C_i$  and  $e$  affect the accuracy of the results. The method is still able to identify the same or related individuals while the amount of available data has a more pronounced effect on the accuracy. Estimates are

less accurate than in the absence of  $C_i$  and  $e$ . However, when comparing the results for  $r_s = 1.0$  and  $r_s = 0.5$  from the same dataset, the distributions of estimates for  $L > 1,000$  do not overlap. This does provide valuable information (see figures SF10, SF11). For example, for 32 individuals and 10,000 sites, estimates of the relatedness coefficient range between  $[0.68, 1.08]$  when  $r_s = 1.0$  and  $[0.2, 0.45]$  when  $r_s = 0.5$ . With  $N > 200$  and  $L > 1,000$  estimates of  $r$  and  $C_i$  are highly accurate with small error values.

The more distant the genetic relatedness between two individuals the more data are needed to identify it. Figure 5 shows results for pedigree *f2.1*. Again, note that with 203 individuals and  $\geq 10,000$  sites,  $r_s$  of 0.25 and  $C_i$  are accurately inferred (see supplementary figures SF12, SF13 and SF14 for more details and error values). The same is true for pedigree *f3.1* as seen in supplementary figures SF15, SF16 and SF17. The likelihood landscape under the presence and absence of  $C_i$  and  $e$  is shown in supplementary figure SF30.

In conclusion, the proposed method can accurately infer the degree of genetic relatedness even in the presence of contamination and sequencing error. However, 1st, 2nd and 3rd degree relatedness require more data to be identified than when identifying DNA sequences that originate from the same individual. For example, for a  $r_s = 1.0$  and  $N = 32$ ,  $\bar{r}$  is still 0.84. In this case the distributions of estimates in figure SF11 show that the values do not drop below  $r = 0.7$  in the majority of the cases (for  $L > 1,000$ ). Our method tends to underestimate the parameters without an overlap between the distributions of estimates for  $r_s = 1.0$ ,  $r_s = 0.5$  and  $r_s = 0.25$ . This fact supports the validity of results for  $r_s = 1.0$  even more, as it seems unlikely that an estimated value of  $r = 0.8$  is seen when the DNA sequences do not originate from the same individual. Even though the individual contamination rates are slightly overestimated, the final estimates of  $r$  are not heavily affected by this.

## 289 Discussion

290 In this study, we present a method to infer the relatedness coefficients from aDNA samples  
291 sequenced from a group of fossil hominin bone or teeth fragments. Our method accounts  
292 for sequencing error and for contamination from present-day humans. By artificially mat-  
293 ing simulated sequences as well as sequences from the 1000 Genomes Project, we determine  
294 how many overlapping reads and how many individuals are required to obtain estimates of  
295 relatedness coefficients with confidence. The likelihood model we developed for this pur-  
296 pose differs from existing methods in that we directly model the (hidden) ancient derived  
297 allele frequencies and do not require a reference panel for the ancient population.

298

299 In our simulations, we assumed that each polymorphic site is sequenced in every in-  
300 dividual. With that assumption, the number of overlapping sites is a parameter under  
301 our control. The actual number of overlapping sites when there is low coverage sequence  
302 data is a random variable whose distribution depends on the sequencing method used.  
303 For shotgun sequencing, the simplest assumption is that the number of times a polymor-  
304 phic site is sequenced is a Poisson distributed random variable with the mean equal to  
305 the coverage level,  $\lambda_i$  for individual  $i$ . The probability that the site is sequenced at least  
306 once in individuals  $i$  and  $j$  is  $(1 - e^{-\lambda_i})(1 - e^{-\lambda_j})$ . For example if  $\lambda_i = \lambda_j = 0.1$  (i. e.  
307 0.1X coverage in both individuals), the probability that a site is covered by at least one  
308 read is roughly 0.009. Therefore if there are  $3 * 10^6$  polymorphic sites, there would be  
309 roughly 27,000 overlapping sites in two individuals. Different sets of sites would overlap  
310 in different pairs of individuals. Hence the expected number of samples that contribute  
311 to estimates of allele frequencies at each site in a sample of  $N$  individuals is  $N\bar{\lambda}$  where  
312  $\bar{\lambda}$  is the average coverage level. In the supplementary section (see supplementary tables  
313 3 and 4 and supplementary figures SF18 - SF29) we allowed for this possibility in sim-  
314 ulations by assuming that fully overlapping sites in all individuals are not available. As  
315 expected the accuracy of the method decreases when compared to using all individuals.  
316 However, the more individuals in total are available in a dataset, the higher the accuracy  
317 even when only using read information from a random subset (e.g. 5 or 10 individuals)  
318 of them at each genomic site. An alternative to shotgun sequencing is genomic capture

319 ([8] and [15]). With a capture method that targets sites known to be polymorphic in the  
 320 same or a closely related population, the probability that two sites are sequenced in two  
 321 individuals depends on a number of factors, including the closeness of the population or  
 322 populations used for ascertainment and the complexity of the genomic library. However,  
 323 the success of targeted capture methods can be quite high. For example, Castellano et al.  
 324 [3] used exome capture on two Neanderthal samples. In the El Sidron sample which had  
 325 0.2% endogenous DNA, 92.8% of targeted sites were covered at least once. In the Vindija  
 326 33.15 sample which had 0.5% endogenous DNA, 98.8% of the targeted sites were covered.  
 327 Therefore, if exome or SNP capture methods are used there is a good chance of high levels  
 328 of overlap in different individuals.

329

330 In our analysis we assume that the sampled (ancient) population is in Hardy-Weinberg  
 331 equilibrium. That assumption allows us to derive the genotype frequencies from allele fre-  
 332 quencies. If a population is made up of inbred individuals, then our method would not  
 333 yield accurate results.

334

335 We do not make any inferences about the time of separation of the contaminating  
 336 (present-day) population from the sampled (ancient) population. If the contaminating  
 337 population is closely related to the sampled population, then allele frequencies in the two  
 338 populations will be similar and the estimated allele frequencies in the ancient sample will  
 339 depend only weakly on the contamination rate. The estimate of the contamination rate  
 340 would not be accurate but the error in estimating that rate would not strongly affect  
 341 estimates of relatedness coefficients. If the contaminating population has quite different  
 342 allele frequencies, the estimates of contamination rate will be more accurate.

343

344 Finally, admixture from the ancient (e.g. Neanderthal) population into the contami-  
 345 nating (e.g. modern human) population will not affect our method. Admixture will make  
 346 some of the contaminating allele frequencies slightly more similar to Neanderthals than  
 347 they would be in the absence of admixture, which should not affect the estimates of con-  
 348 tamination rates or relatedness coefficients.

349

| Dataset                             | n = N             | n = 2             |
|-------------------------------------|-------------------|-------------------|
| N=17, L=10.000, $C_i=0$ , $e=0$     | 0.30, 0.21; 0.056 | 0.31, 0.19; 0.037 |
| N=32, L=20.000, $C_i=0$ , $e=0$     | 0.40, 0.10; 0.02  | 0.41, 0.09; 0.019 |
| N=17, L=10.000, $C_i > 0$ , $e > 0$ | 0.17, 0.33; 0.058 | 0.19, 0.32; 0.06  |
| N=32, L=20.000, $C_i > 0$ , $e > 0$ | 0.31, 0.20; 0.047 | 0.35, 0.16; 0.056 |

Table 1: Estimation results are shown for a pair of simulated parent-offspring individuals when using the complete approach (n = N individuals) and the subset approach (n = 2 individuals). Numbers in the second and third column are as follows:  $\bar{r}$ , rmse of  $\bar{r}$ ; rmse of  $C_i$ .  $\bar{r}$  is given as an average over 50 independent runs. Although when using n = N, r is estimated for all possible pairs of individuals, only one is shown for the pair of interest.

## Acknowledgments

The authors gratefully acknowledge the help of Mike Martin. This work was supported in part by the Max Planck Society (as a salary for C.T.) and in part by a US National Institutes of Health grant (R01-GM40282 to M.S. and F.R.).

## Supplementary Material

Supplementary figures are available online at [www...](http://www...)

Moreover, we compared the subset approach to the complete approach (see 'parameter estimation' in Methods section). For example, for a complete set of  $N = 17$  there are  $(17 * (16)/2) = 136$  different  $r_{i,j}$  to be estimated, one for each pair of individuals. When only interested in a subset of  $n = 2$  individuals, there is only one  $r_{i,j}$  that needs to be estimated, greatly reducing the computational time. Table 1 shows results for two examples of  $\bar{r}$  for a certain pair of parent-offspring individuals. We do not observe striking differences in the estimates and error values between the two approaches. However, estimates for  $C_i$  under pedigree *f1.1* are slightly better when using  $n = N$  as the allelic configurations of all individuals contribute to the overall likelihood. These differences in  $C_i$  account for the slight differences in estimates of r.

We further analyzed whether different types of genomic sites affect the results of the estimations. We tested the method by filtering the data for 1) fixed and polymorphic sites 2) only polymorphic sites and 3) polymorphic sites that were either changed to being fixed or remained polymorphic after biasing the data with contamination and sequencing error.

| Dataset                             | Class 1           | Class 2           |
|-------------------------------------|-------------------|-------------------|
| N=17, L=10.000, $C_i > 0$ , $e > 0$ | 0.15, 0.36; 0.10  | 0.19, 0.32; 0.059 |
| N=32, L=10.000, $C_i > 0$ , $e > 0$ | 0.33, 0.18; 0.064 | 0.35, 0.16; 0.046 |
| N=47, L=10.000, $C_i > 0$ , $e > 0$ | 0.41, 0.10; 0.039 | 0.40, 0.11; 0.040 |

Table 2: Estimation results are shown for a pair of simulated parent-offspring individuals when using polymorphic and fixed sites (1) or only polymorphic sites (2). Numbers in the second and third column are as follows:  $r_{i,j}$ , rmse of  $r_{i,j}$ ; rmse of  $C_i$ .  $r_{i,j}$  is given as an average over 50 independent runs.

|      |             |          | N=5 of 17  | N=5 of 32  | N=5 of 47  |
|------|-------------|----------|------------|------------|------------|
| f1.0 | $r_s = 1.0$ | L=10.000 | 0.89, 0.15 | 0.97, 0.14 | 0.98, 0.17 |
|      |             | L=20.000 | 0.87, 0.15 | 1.02, 0.11 | 1.0, 0.09  |
|      | $r_s = 0.5$ | L=10.000 | 0.31, 0.23 | 0.41, 0.21 | 0.42, 0.28 |
|      |             | L=20.000 | 0.31, 0.20 | 0.43, 0.14 | 0.48, 0.18 |
| f1.1 | $r_s = 1.0$ | L=10.000 | 0.71, 0.38 | 0.87, 0.26 | 1.01, 0.27 |
|      |             | L=20.000 | 0.70, 0.34 | 0.87, 0.23 | 0.96, 0.27 |
|      | $r_s = 0.5$ | L=10.000 | 0.19, 0.32 | 0.36, 0.27 | 0.40, 0.36 |
|      |             | L=20.000 | 0.22, 0.30 | 0.35, 0.25 | 0.40, 0.23 |

Table 3: Subsampling approach: estimates of simulated relatedness coefficients (and rmse) of  $r_s = 1.0$  and  $r_s = 0.5$  over 50 independent datasets for pedigrees *f1.0* and *f1.1* when using reads from only 5 randomly selected individuals (out of N) per genomic site.

371 We refer to these different classes of sites as 1, 2 and 3. As can be seen from an example in  
372 table 2, especially for datasets with fewer individuals and sites, using only sites from class  
373 2 does slightly improve the estimates of contamination rates and, therefore, the overall  
374 estimates of  $r$ . In summary, accuracy for the different site classes is as follows:  $1 > 3 > 2$ .  
375 We therefore apply the method to polymorphic sites only.

376

377 The results shown so far are based on an implementation of the method where  $p_k$  is  
378 calculated as  $p_k = \frac{q_k - \bar{C}f_k}{1 - \bar{C}}$ . We also implemented an approach where each  $p_k$  is a param-  
379 eter that is estimated by the optimization algorithm and not calculated as before. This  
380 adds L parameters to the optimization procedure. This approach also strongly increases  
381 the computational time of the method. Obtained results (not shown) are surprisingly  
382 similar to the original method but because of the increase in runtime and lack of improved  
383 accuracy this technique is less useful in practice.

384

|      |             |          | N=10 of 17 | N=10 of 32 | N=10 of 47 |
|------|-------------|----------|------------|------------|------------|
| f1.0 | $r_s = 1.0$ | L=10.000 | 0.89, 0.13 | 0.96, 0.09 | 0.99, 0.11 |
|      |             | L=20.000 | 0.87, 0.12 | 0.91, 0.10 | 1.0, 0.08  |
|      | $r_s = 0.5$ | L=10.000 | 0.30, 0.20 | 0.45, 0.10 | 0.46, 0.12 |
|      |             | L=20.000 | 0.32, 0.19 | 0.39, 0.12 | 0.46, 0.11 |
| f1.1 | $r_s = 1.0$ | L=10.000 | 0.69, 0.34 | 0.84, 0.24 | 0.91, 0.23 |
|      |             | L=20.000 | 0.68, 0.33 | 0.82, 0.20 | 0.91, 0.17 |
|      | $r_s = 0.5$ | L=10.000 | 0.19, 0.32 | 0.35, 0.19 | 0.39, 0.21 |
|      |             | L=20.000 | 0.22, 0.30 | 0.33, 0.19 | 0.41, 0.19 |

Table 4: Subsampling approach: estimates of simulated relatedness coefficients (and rmse) of  $r_s = 1.0$  and  $r_s = 0.5$  over 50 independent datasets for pedigree *f1.0* and *f1.1* when using reads from only 10 randomly selected individuals (out of N) per genomic site.

## References

- [1] 1000 Genomes Project Consortium, Adam Auton, Lisa D. Brooks, Richard M. Durbin, Erik P. Garrison, Hyun Min Kang, Jan O. Korb, Jonathan L. Marchini, Shane McCarthy, Gil A. McVean, and Gonçalo R. Abecasis. A global reference for human genetic variation. *Nature*, 526(7571):68–74, 2015.
- [2] Sharon R. Browning and Brian L. Browning. High-Resolution Detection of Identity by Descent in Unrelated Individuals. *American Journal of Human Genetics*, 86(4):526–539, 2010.
- [3] Sergi Castellano, Genís Parra, Federico A. Sánchez-Quinto, Fernando Racimo, Martin Kuhlwilm, Martin Kircher, Susanna Sawyer, Qiaomei Fu, Anja Heinze, Birgit Nickel, Jesse Dabney, Michael Siebauer, Louise White, Hernán A Burbano, Gabriel Renaud, Udo Stenzel, Carles Lalueza-Fox, Marco de la Rasilla, Antonio Rosas, Pavao Rudan, Dejana Brajković, Željko Kucan, Ivan Gušić, Michael V. Shunkov, Anatoli P. Derevianko, Bence Viola, Matthias Meyer, Janet Kelso, Aida M. Andrés, and Svante Pääbo. Patterns of coding variation in the complete exomes of three Neandertals. *Proceedings of the National Academy of Sciences of the United States of America*, 111(18):6666–71, 2014.
- [4] Chad D. Huff, David J. Witherspoon, Tatum S. Simonson, Jinchuan Xing, W. Scott Watkins, Yuhua Zhang, Therese M. Tuohy, Deborah W. Neklason, Randall W. Burt, Stephen L. Guthery, Scott R. Woodward, and Lynn B. Jorde. Maximum-likelihood estimation of recent shared ancestry (ERSA). *Genome Research*, 21(5):768–774, 2011.
- [5] Davis. E. King. Dlib-ml: A Machine Learning Toolkit. *Journal of Machine Learning Research*, 10:1755–1758, 2009.
- [6] A Kong, D F Gudbjartsson, J Sainz, G M Jonsdottir, S A Gudjonsson, B Richardson, S Sigurdardottir, J Barnard, B Hallbeck, G Masson, A Shlien, S T Palsson, M L Frigge, T E Thorgeirsson, J R Gulcher, and K Stefansson. A high-resolution recombination map of the human genome. *Nat Genet*, 31(3):241–247, 2002.
- [7] Hong Li, Gustavo Glusman, Hao Hu, Shankaracharya, Juan Caballero, Robert Hubley, David Witherspoon, Stephen L. Guthery, Denise E. Mauldin, Lynn B. Jorde,



- Leroy Hood, Jared C. Roach, and Chad D. Huff. Relationship Estimation from Whole-Genome Sequence Data. *PLoS Genetics*, 10(1), 2014.
- [8] Lira Mamanova, Alison J Coffey, Carol E Scott, Iwanka Kozarewa, Emily H Turner, Akash Kumar, Eleanor Howard, Jay Shendure, and Daniel J Turner. Target-enrichment strategies for next-generation sequencing. *Nature methods*, 7(2):111–8, 2010.
  - [9] M.D. Martin, F. Jay, S. Castellano, and M. Slatkin. Determination of genetic relatedness in low-coverage human genomic sequence data using pedigree simulations. *In preparation*, 2017.
  - [10] Iain Mathieson, Iosif Lazaridis, Nadin Rohland, Swapan Mallick, Nick Patterson, Songül Alpaslan Roodenberg, Eadaoin Harney, Kristin Stewardson, Daniel Fernandes, Mario Novak, Kendra Sirak, Cristina Gamba, Eppie R. Jones, Bastien Llamas, Stanislav Dryomov, Joseph Pickrell, Juan-Luís Arsuaga, José María Bermúdez de Castro, Eudald Carbonell, Fokke Gerritsen, Aleksandr Khokhlov, Pavel Kuznetsov, Marina Lozano, Harald Meller, Oleg Mochalov, Vyacheslav Moiseyev, Manuel A. Rojo Guerra, Jacob Roodenberg, Josep Maria Vergès, Johannes Krause, Alan Cooper, Kurt W. Alt, Dorcas Brown, David Anthony, Carles Lalueza-Fox, Wolfgang Haak, Ron Pinhasi, and David Reich. Genome-wide patterns of selection in 230 ancient Eurasians. *Nature*, 528(7583):499–503, 2015.
  - [11] Trevor J. Pemberton, Chaolong Wang, Jun Z. Li, and Noah A. Rosenberg. Inference of unexpected genetic relatedness among individuals in HapMap phase III. *American Journal of Human Genetics*, 87(4):457–464, 2010.
  - [12] Kay Prüfer, Fernando Racimo, Nick Patterson, Flora Jay, Sriram Sankararaman, Susanna Sawyer, Anja Heinze, Gabriel Renaud, Peter H Sudmant, Cesare de Filippo, Heng Li, Swapan Mallick, Michael Dannemann, Qiaomei Fu, Martin Kircher, Martin Kuhlwilm, Michael Lachmann, Matthias Meyer, Matthias Ongyerth, Michael Siebauer, Christoph Theunert, Arti Tandon, Priya Moorjani, Joseph Pickrell, James C Mullikin, Samuel H Vohr, Richard E Green, Ines Hellmann, Philip L F Johnson, Hélène Blanche, Howard Cann, Jacob O Kitzman, Jay Shendure, Evan E Eichler, Ed S Lein, Trygve E Bakken, Liubov V Golovanova, Vladimir B Doronichev, Michael V Shunkov, Anatoli P Derevianko, Bence Viola, Montgomery Slatkin, David Reich, Janet Kelso, and Svante Pääbo. The complete genome sequence of a Neanderthal from the Altai Mountains. *Nature*, 505(7481):43–9, 2014.
  - [13] S Purcell, B Neale, K Todd-Brown, L Thomas, M A R Ferreira, D Bender, J Maller, P Sklar, P I W de Bakker, M J Daly, and P C Sham. PLINK: A tool set for whole-genome association and population-based linkage analyses. *American Journal of Human Genetics*, 81(3):559–575, 2007.
  - [14] Fernando Racimo, Gabriel Renaud, and Montgomery Slatkin. Joint Estimation of Contamination, Error and Demography for Nuclear DNA from Ancient Humans. *PLoS Genetics*, 12(4), 2016.
  - [15] Nadin Rohland and David Reich. Cost-effective, high-throughput DNA sequencing libraries for multiplexed target capture. *Genome Research*, 22(5):939–946, 2012.
  - [16] Susanna Sawyer, Gabriel Renaud, Bence Viola, J.-J. Jean-jacques Hublin, Marie-theres M.-T. Gansauge, M. V. Shunkov, A. P. Derevianko, K. Prüfer, J. Kelso,

and S. Pa a bo. Nuclear and mitochondrial DNA sequences from two Denisovan individuals. *Proceedings of the National Academy of Sciences*, 112(51):2–6, 2015.

- [17] Doug Speed and David J. Balding. Relatedness in the post-genomic era: is it still useful? *Nature Reviews Genetics*, 16(1):33–44, 2015.
- [18] Samuel Vohr, Carlos Buen Abad Najar, Beth Shapiro, and Richard Green. A method for positive forensic identification of samples from extremely low-coverage sequence data. *BMC Genomics*, 16(1):1034, 2015.
- [19] Jinliang Wang. Coancestry: A program for simulating, estimating and analysing relatedness and inbreeding coefficients. *Molecular Ecology Resources*, 11(1):141–145, 2011.
- [20] Bruce S. Weir, Amy D. Anderson, and Amanda B. Hepler. Genetic relatedness analysis: modern data and new challenges. *Nature Reviews Genetics*, 7(10):771–780, 2006.

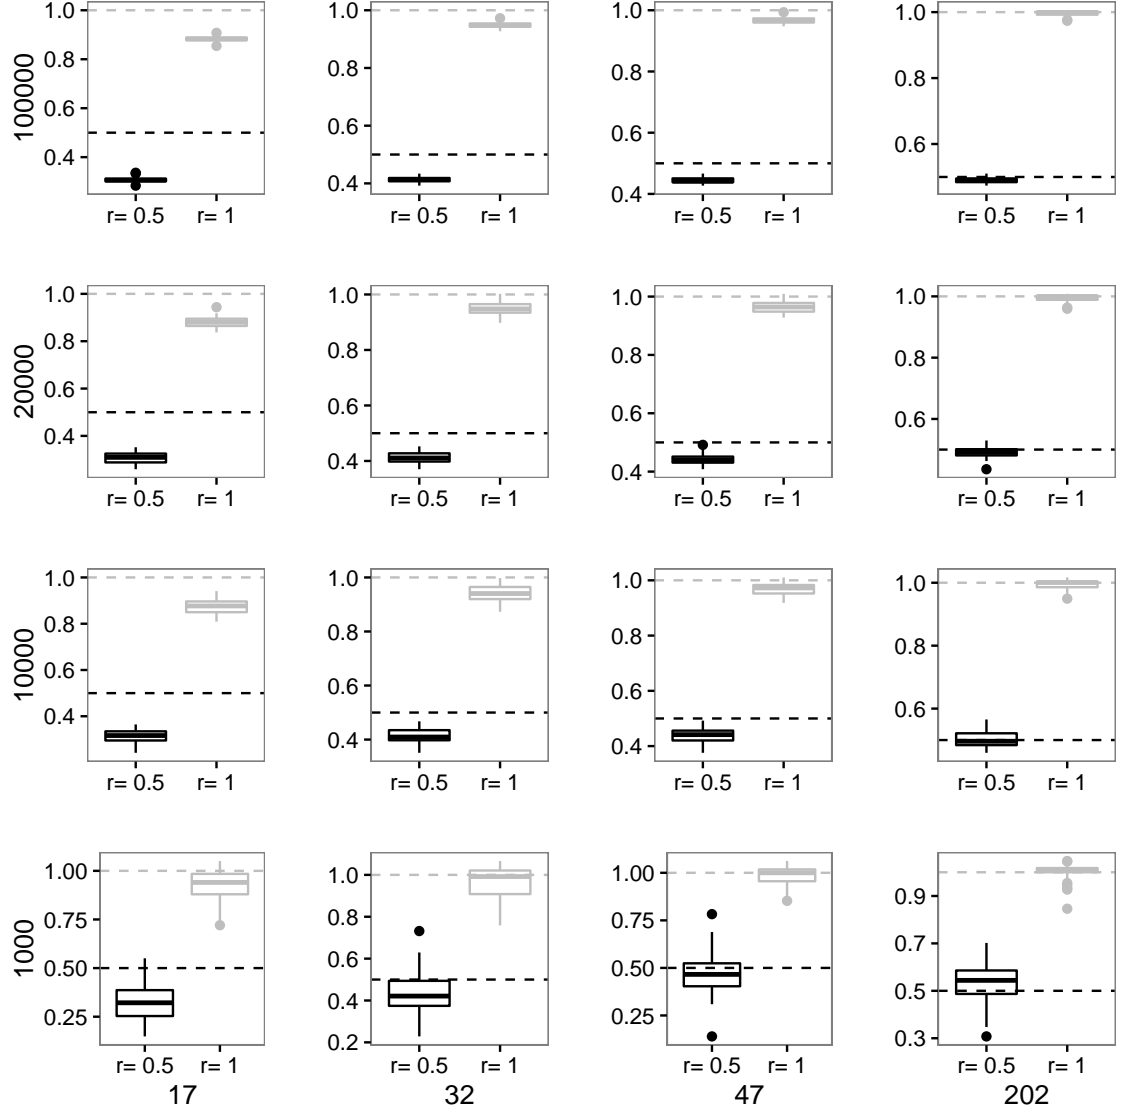

Figure 1: Each panel represents a different combination of  $N$  (columns) and  $L$  (rows) and shows a boxplot for the estimates of simulated relatedness of  $r_s = 1.0$  and  $r_s = 0.5$  over 50 independent datasets for pedigree *f1.0*. Dashed horizontal lines denote the simulated values of  $r_s$ .

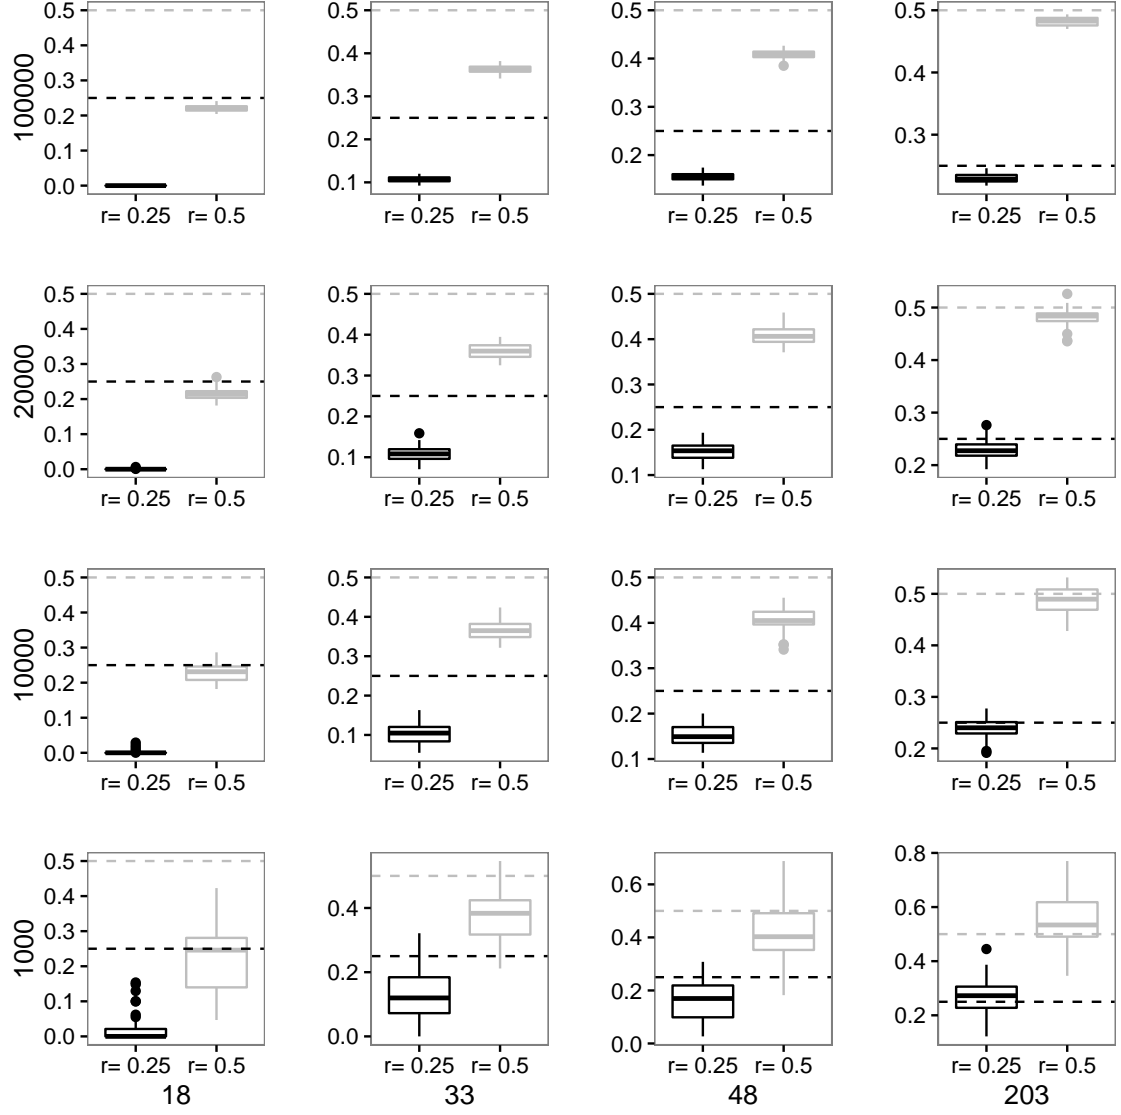

Figure 2: Each panel represents a different combination of  $N$  (columns) and  $L$  (rows) and shows a boxplot for the estimates of simulated relatedness of  $r_s = 0.5$  and  $r_s = 0.25$  over 50 independent datasets for pedigree *f2.0*. Dashed horizontal lines denote the simulated values of  $r_s$ .

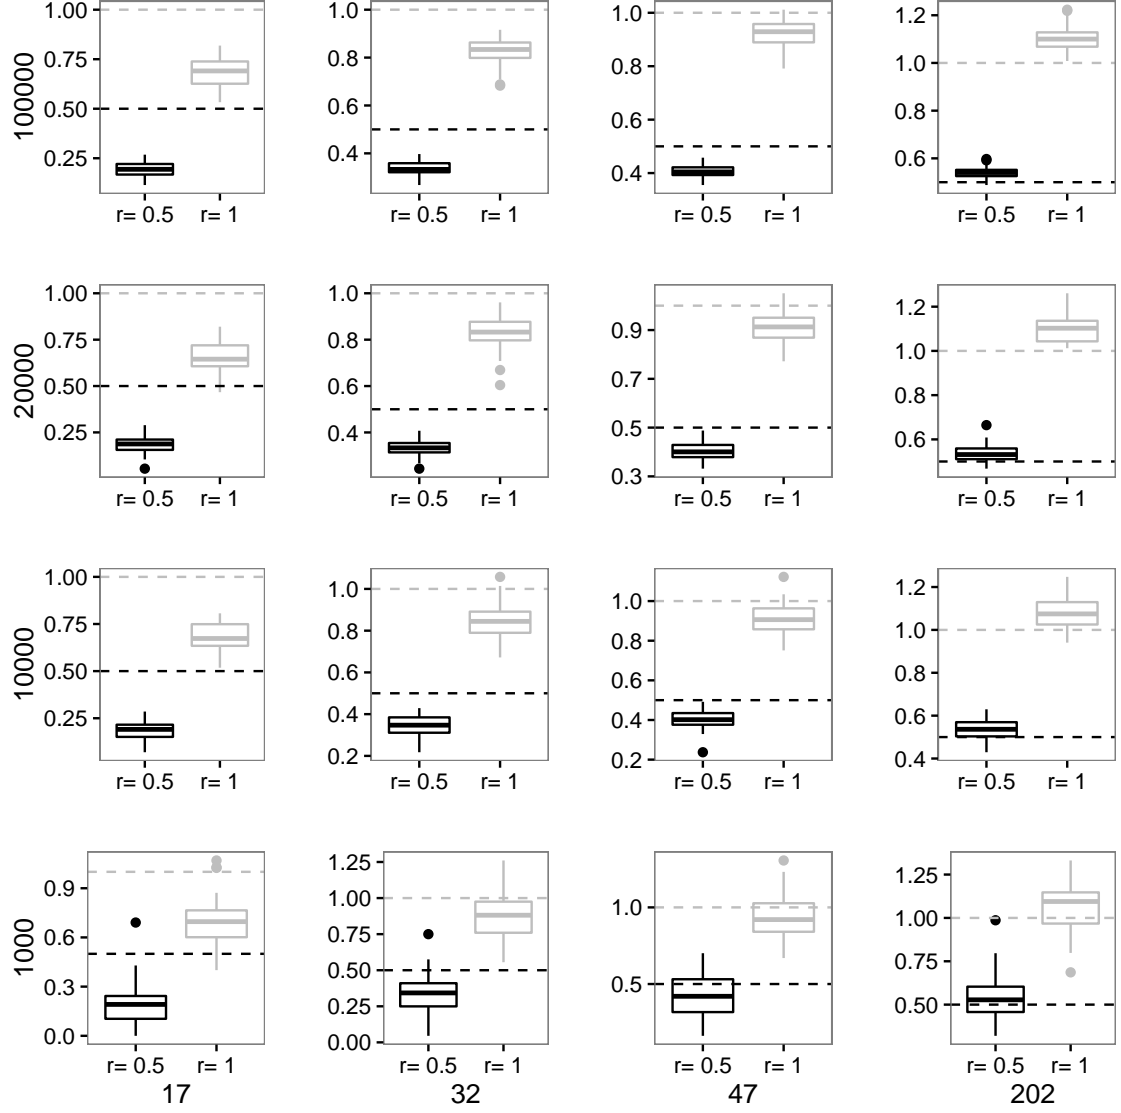

Figure 3: This figure presents results for estimates of  $r_s = 1.0$  and  $r_s = 0.5$  as in figure 1, but with  $C_i$  being between 2% and 25% and sequencing error set to 0.001 as in pedigree *f1.1*.

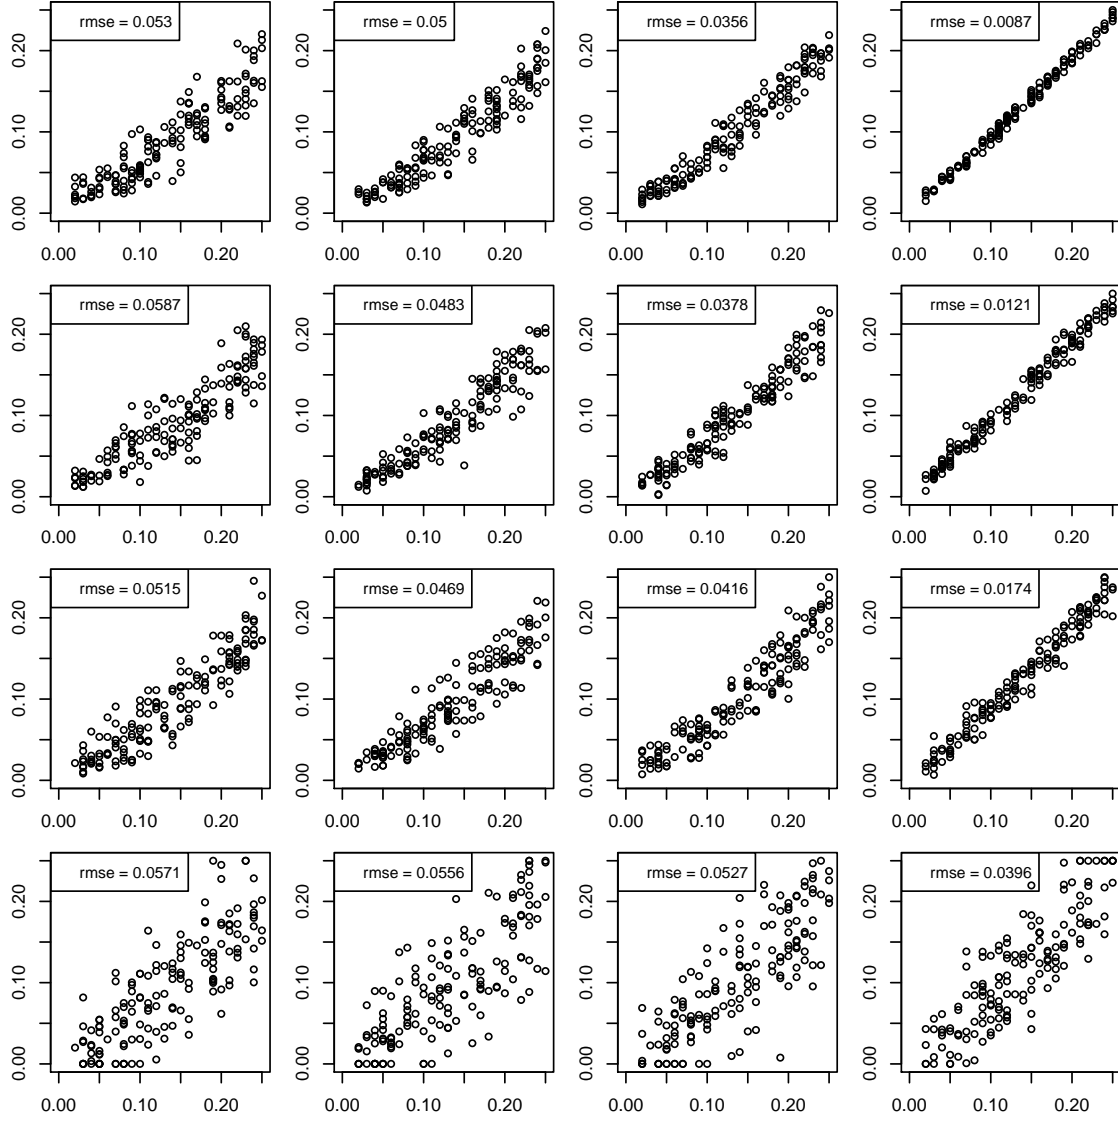

Figure 4: Each panel represents a different combination of  $N$  (columns) and  $L$  (rows) and shows an x-y plot for estimated (x axis) and simulated (y axis) contamination rates for pedigree *f1.1*.  $C_i$  was simulated to be between 2% and 25%.

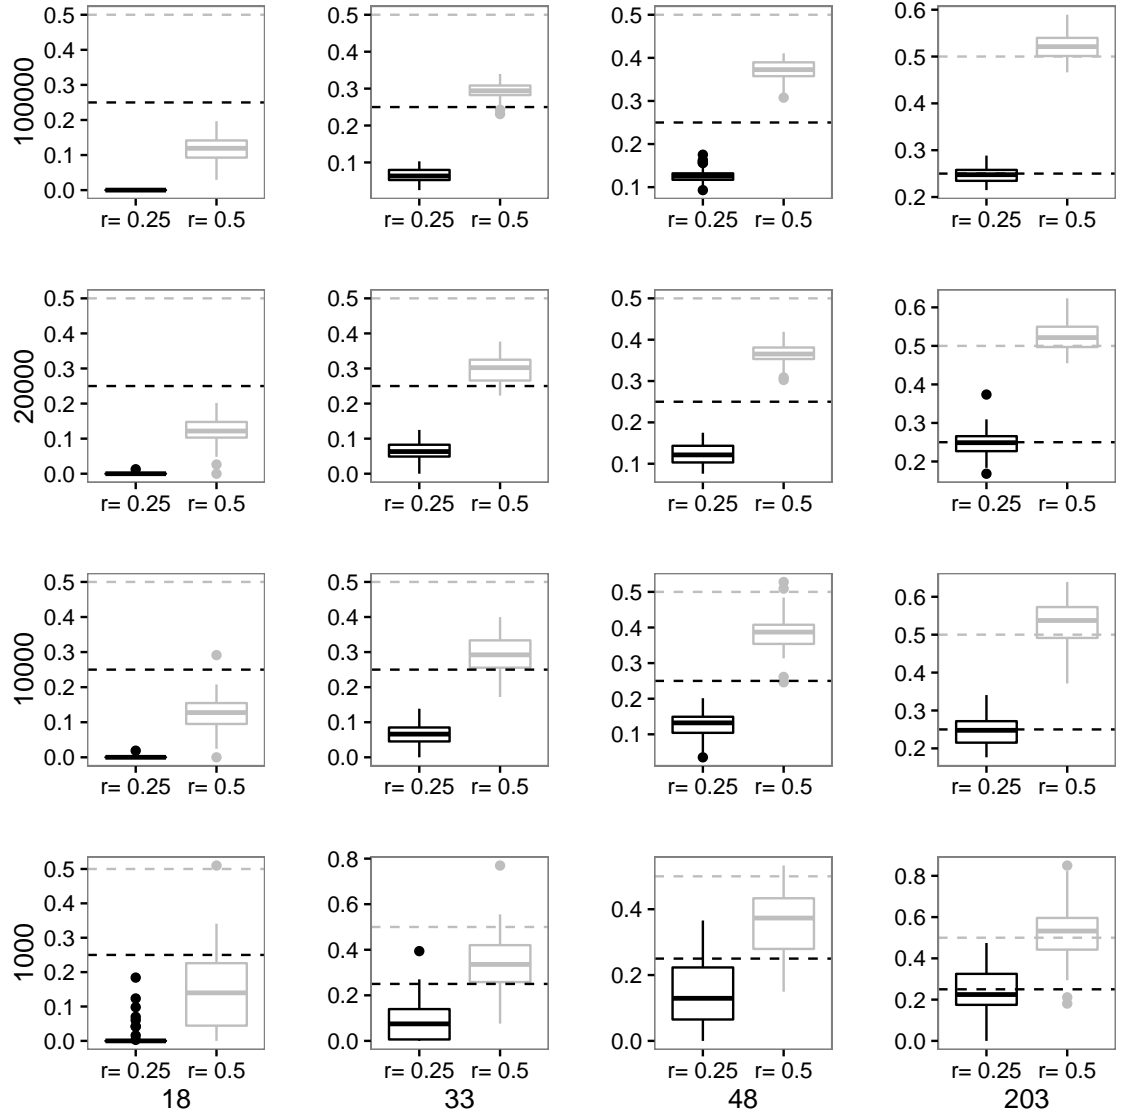

Figure 5: Estimates of  $r_s = 0.5$  and  $r_s = 0.25$  as in figure 2, but with  $C_i$  being between 2% and 25% and sequencing error set to 0.001 as in pedigree *f2.1*.

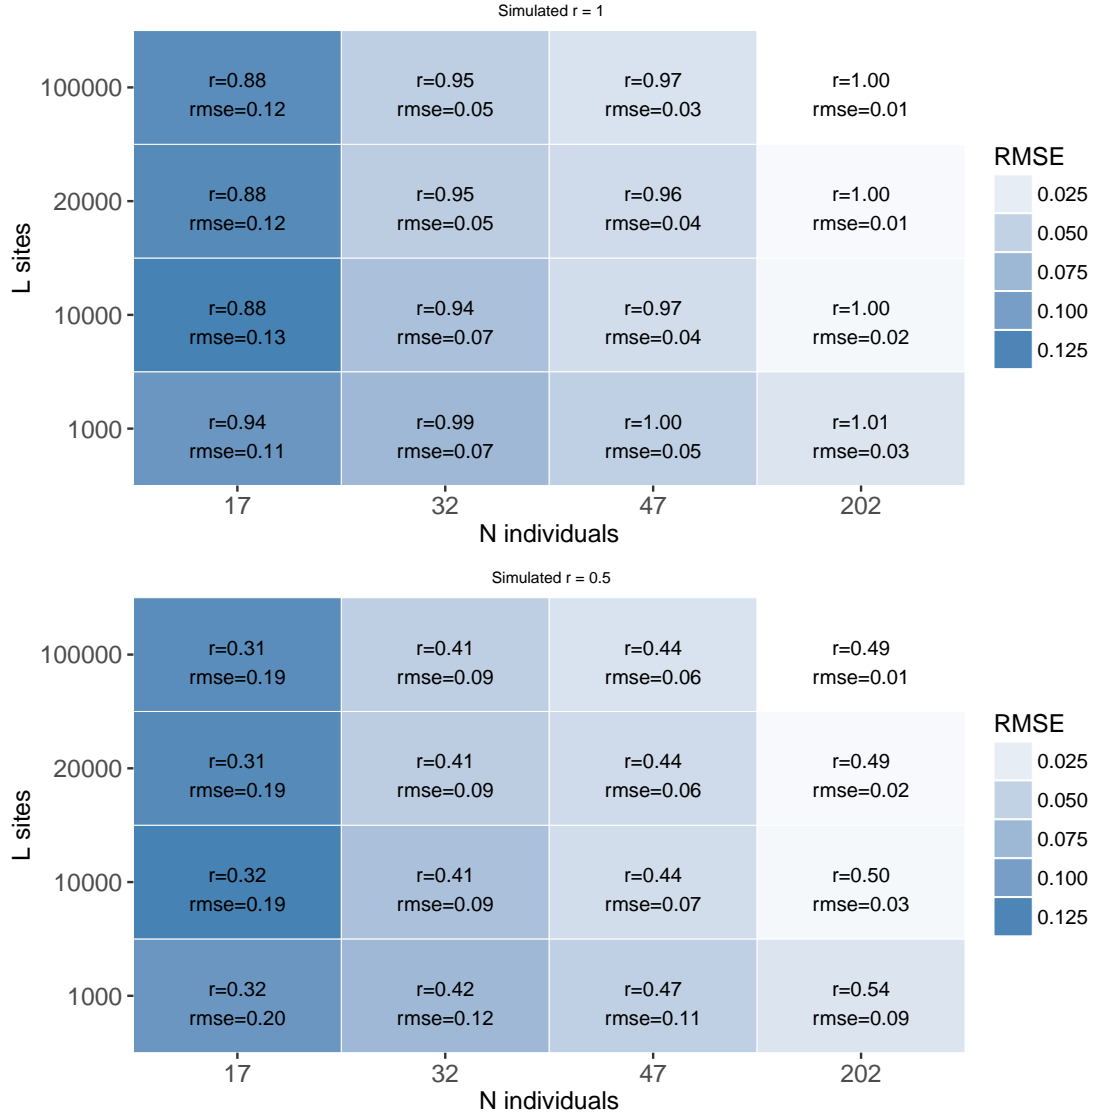

Figure SF1: Each colored box represents a different combination of  $N$  and  $L$  and shows the estimated relatedness coefficient  $r$  (and  $rmse$ ) for a pair of related individuals as an average over 50 independent datasets for pedigree *f1.0*. In each box we show results for simulated  $r_s = 1.0$  (top panel) and  $r_s = 0.5$  (bottom panel).  $C_i = 0$ ,  $e = 0$ . The color intensity represents the magnitude of the  $rmse$  with darker color referring to a higher  $rmse$ .



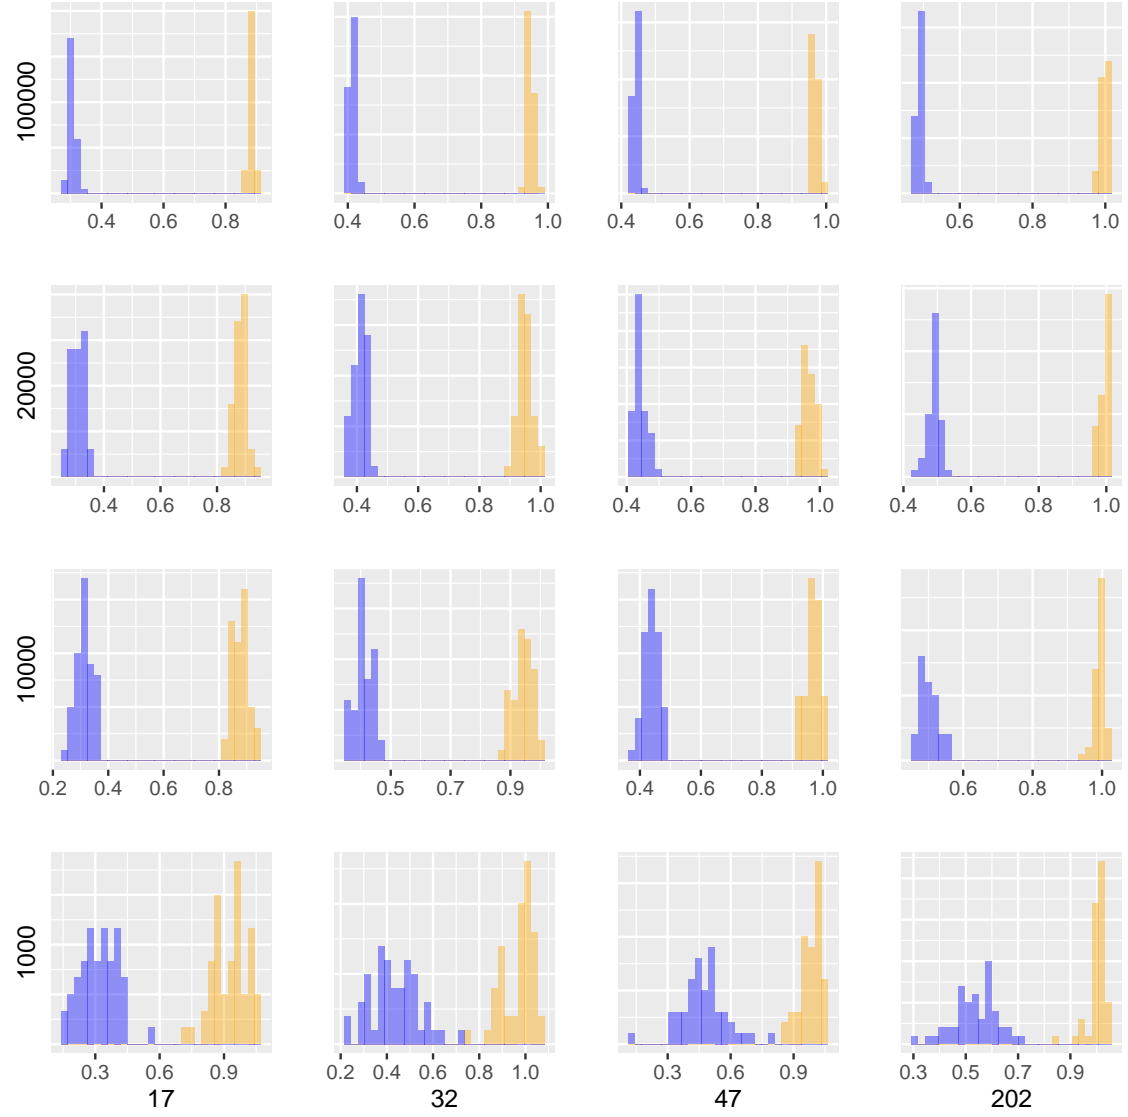

Figure SF2: Each panel represents a different combination of  $N$  (columns) and  $L$  (rows) and shows a histogram for the estimates of simulated relatedness of  $r_s = 1.0$  and  $r_s = 0.5$  over 50 independent datasets for pedigree *f1.0*.

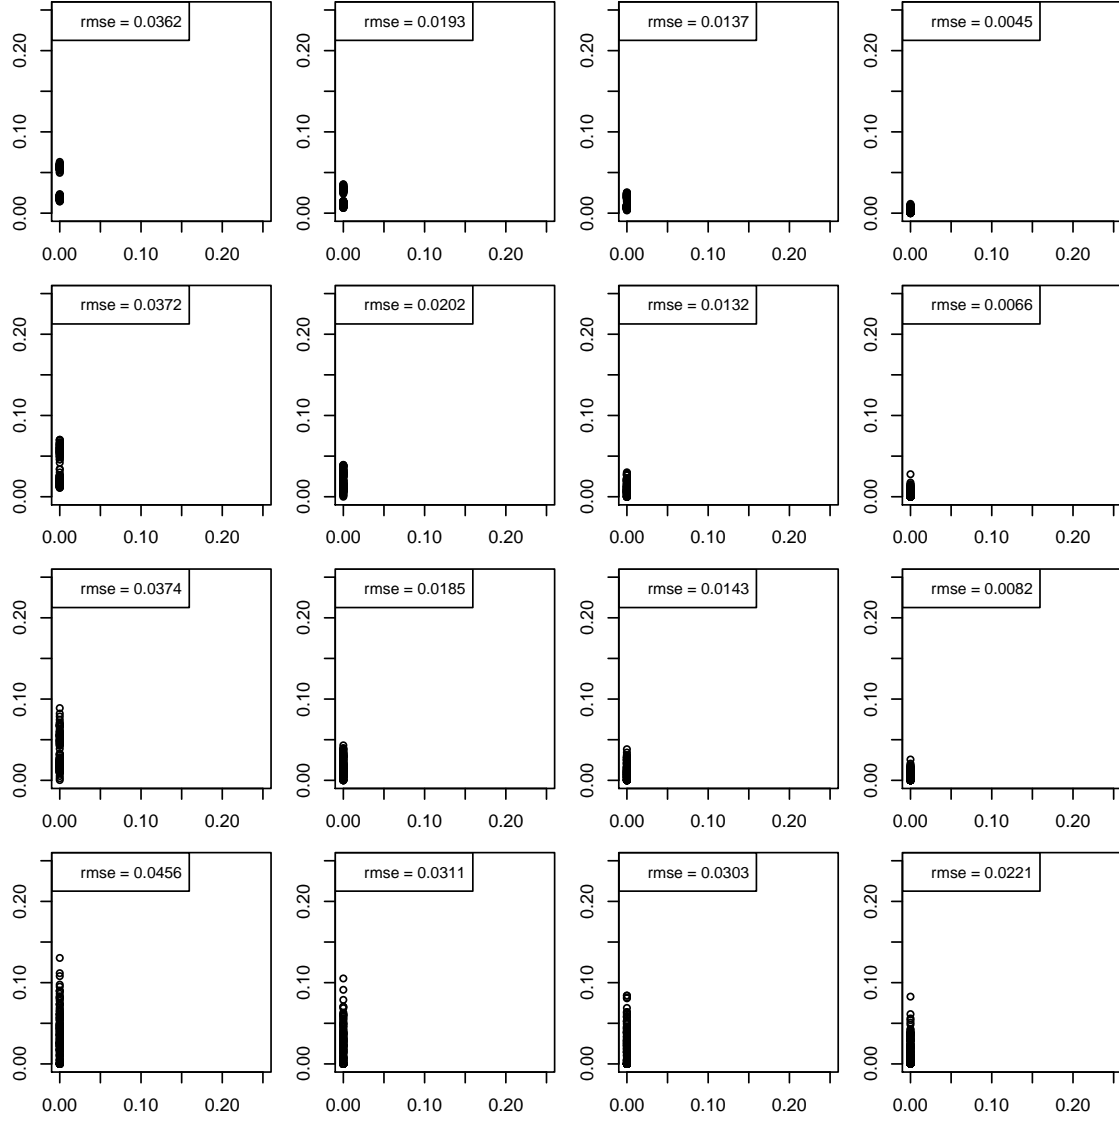

Figure SF3: Each panel represents a different combination of  $N$  (columns) and  $L$  (rows) and shows an x-y plot for estimated (x axis) and simulated (y axis) contamination rates for pedigree *f1.0*.  $C_i$  was simulated to be 0.

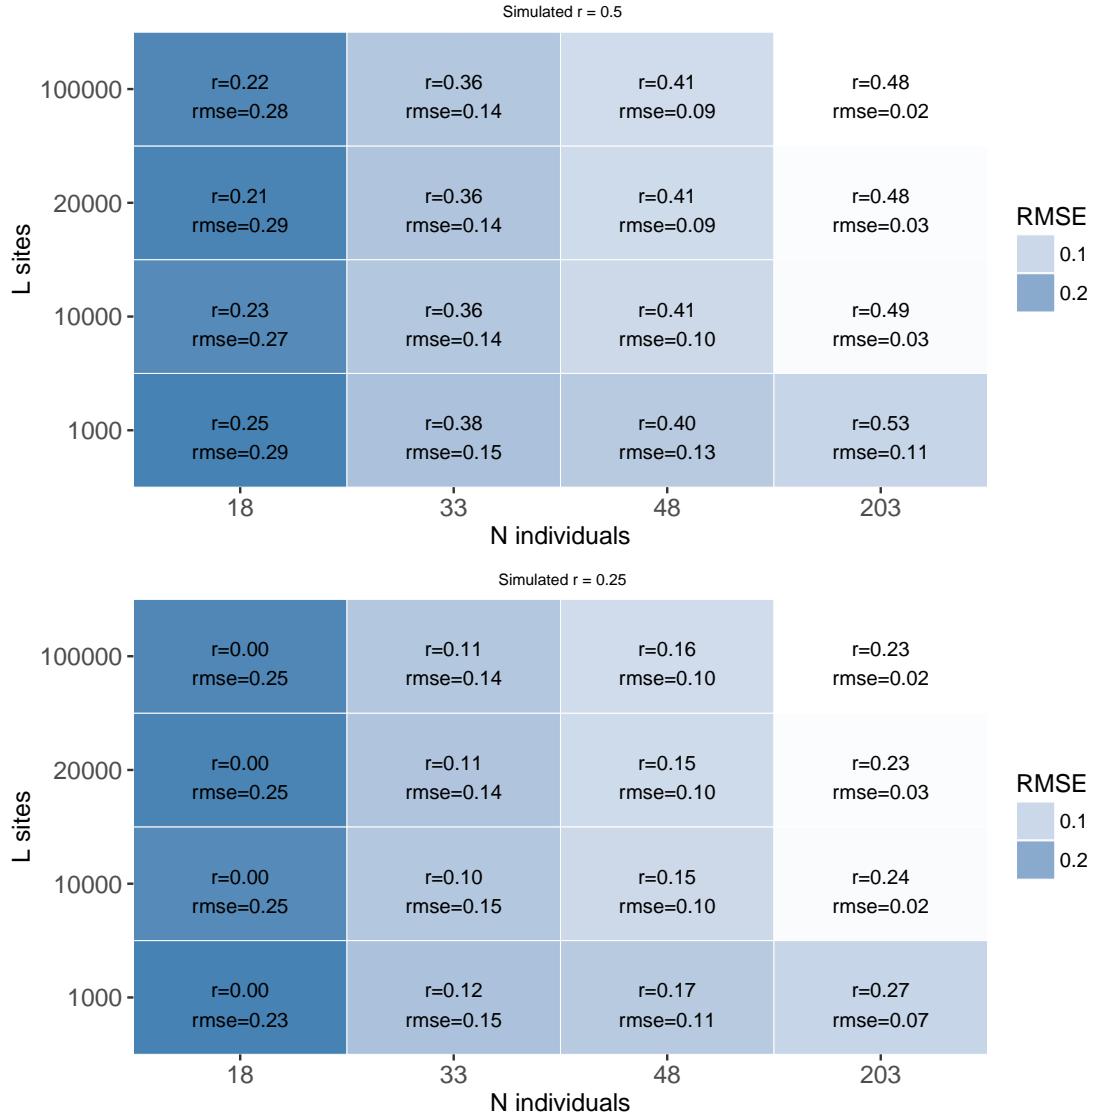

Figure SF4: Similar setting as in figure SF1 but for pedigree  $f2.0$  with  $r_s = 0.5$  (top panel) and  $r_s = 0.25$  (bottom panel).  $C_i = 0$ ,  $e = 0$ .

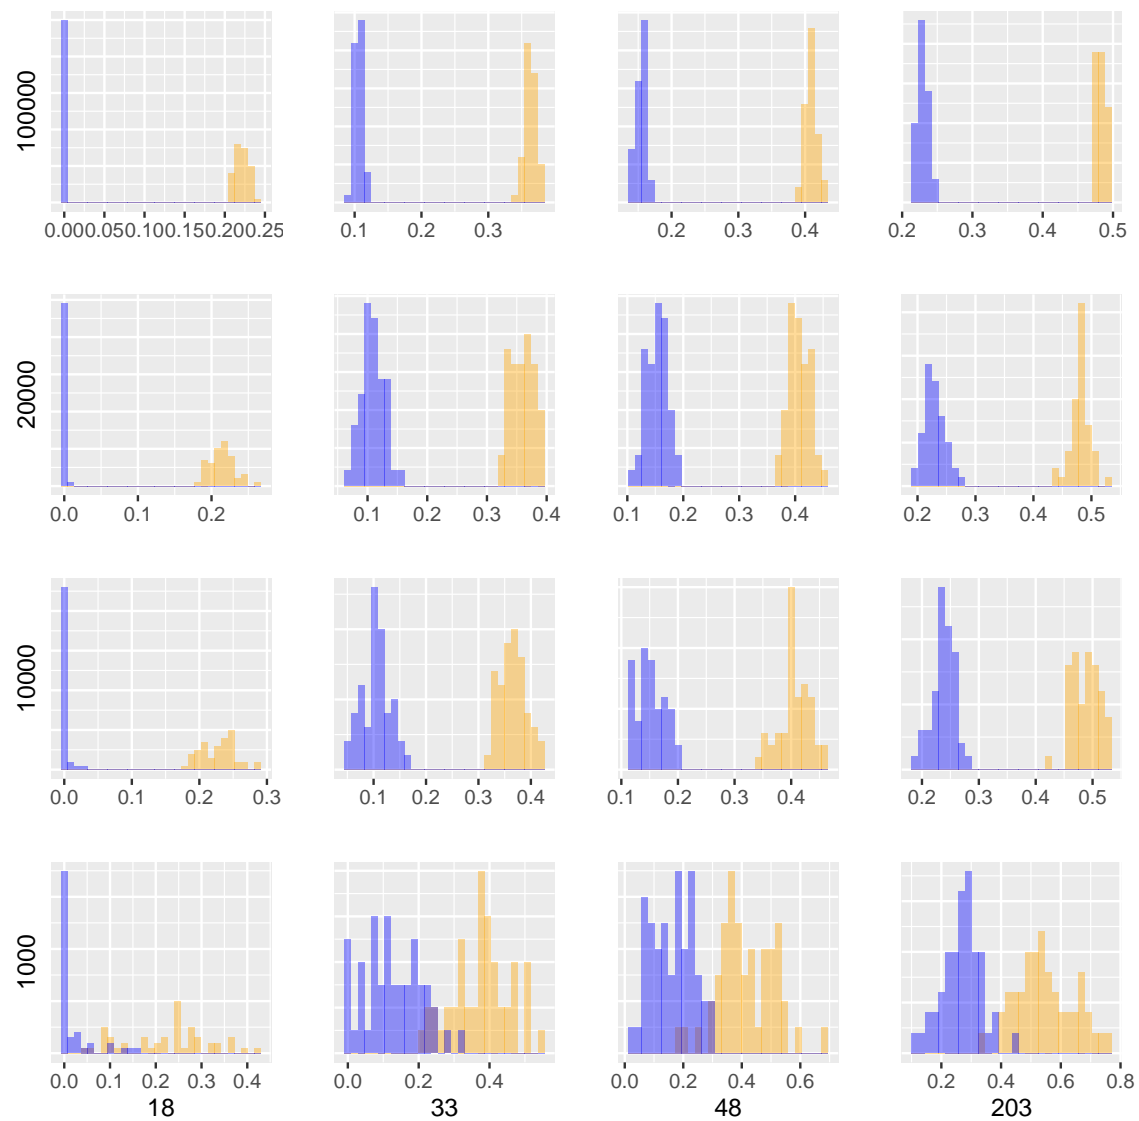

Figure SF5: Similar setting as in figure SF2 but for pedigree *f2.0* with  $r_s = 0.5$  and  $r_s = 0.25$ .  $C_i = 0$ ,  $e = 0$ .

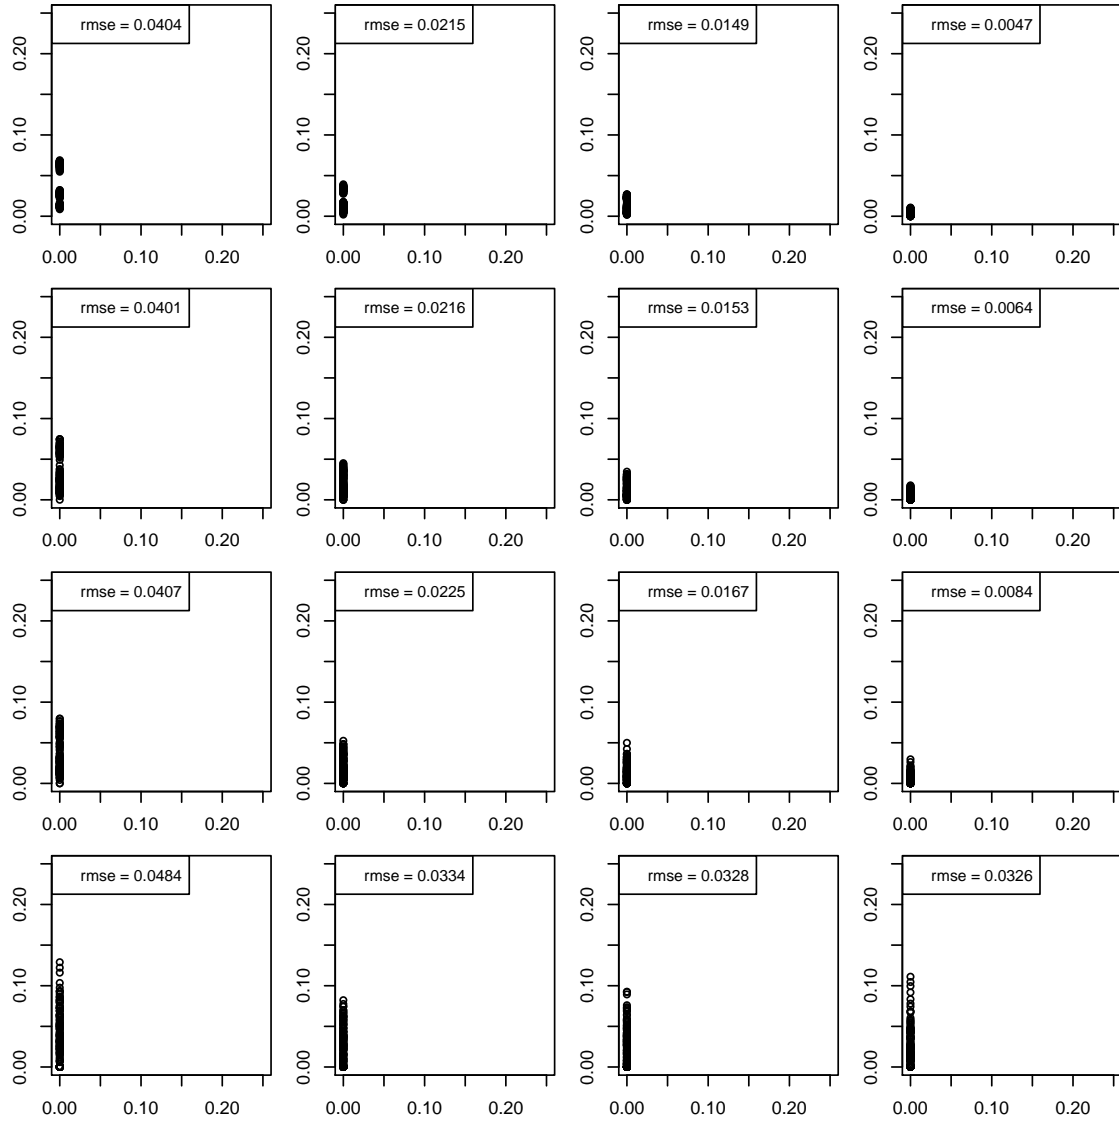

Figure SF6: Similar setting as in figure SF3 but for pedigree *f2.0* with  $r_s = 0.5$  and  $r_s = 0.25$ .  $C_i = 0$ ,  $e = 0$ .

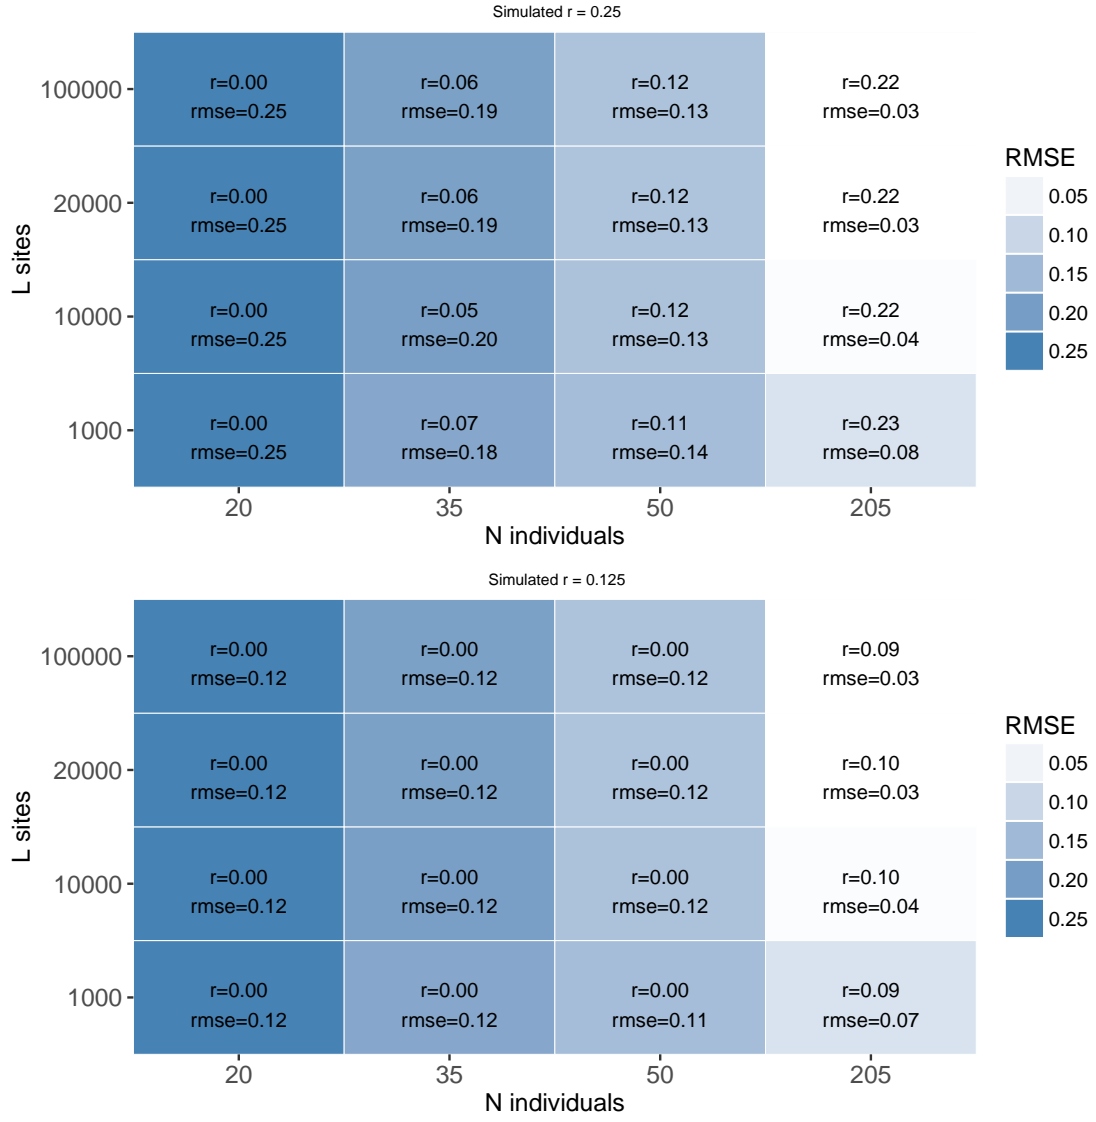

Figure SF7: Similar setting as in figure SF1 but for pedigree *f3.0* with  $r_s = 0.25$  (top panel) and  $r_s = 0.125$  (bottom panel).  $C_i = 0$ ,  $e = 0$ .

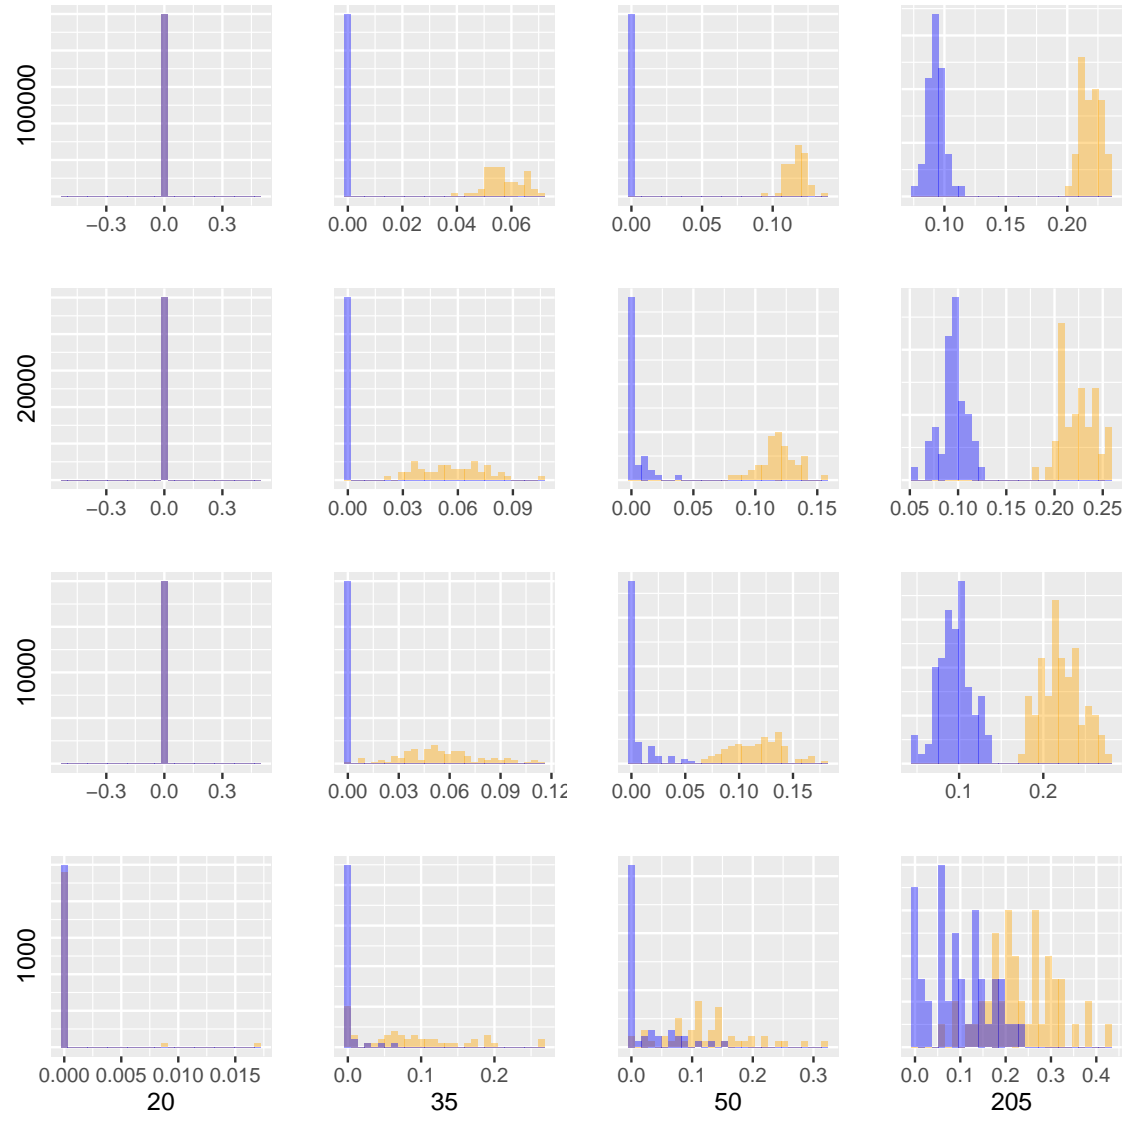

Figure SF8: Similar setting as in figure SF2 but for pedigree *f3.0* with  $r_s = 0.25$  and  $r_s = 0.125$ .  $C_i = 0$ ,  $e = 0$ .

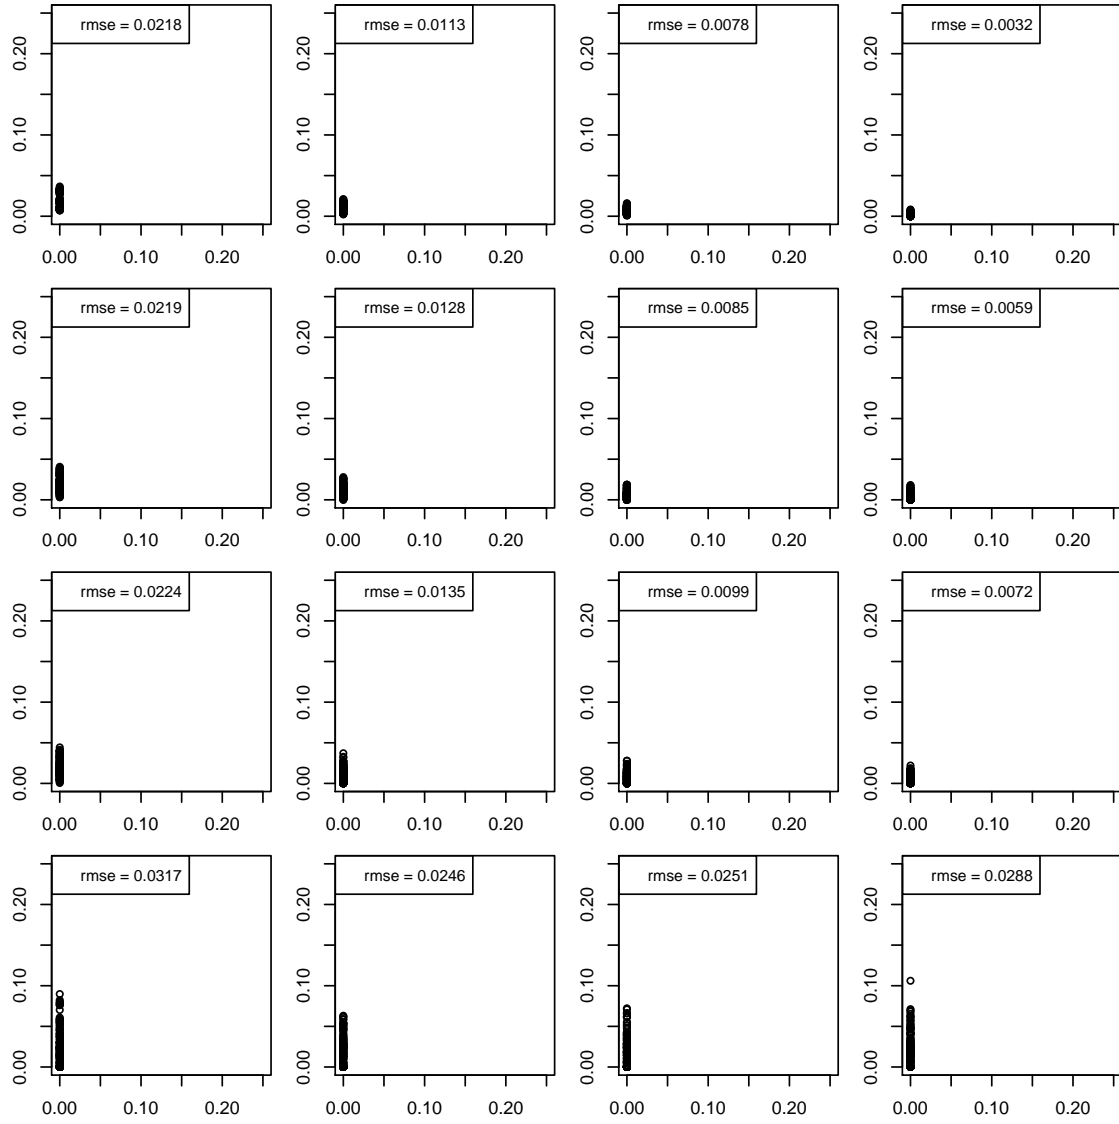

Figure SF9: Similar setting as in figure SF3 but for pedigree  $f3.0$  with  $r_s = 0.25$  and  $r_s = 0.125$ .  $C_i = 0$ ,  $e = 0$ .



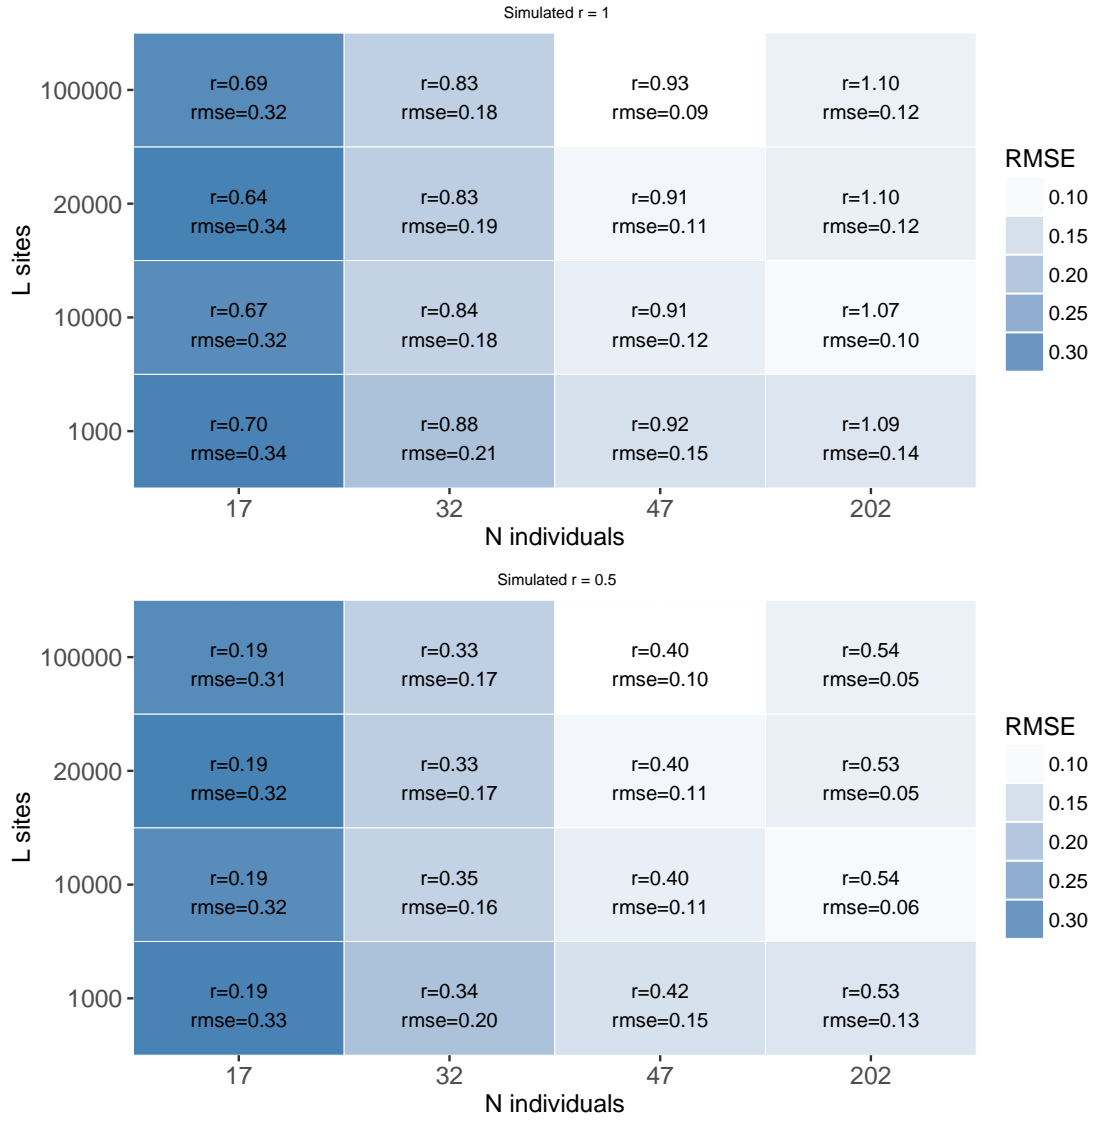

Figure SF10: Similar setting as in figure SF1 but  $C_i$  is between 2% and 25%,  $e = 0.001$ .

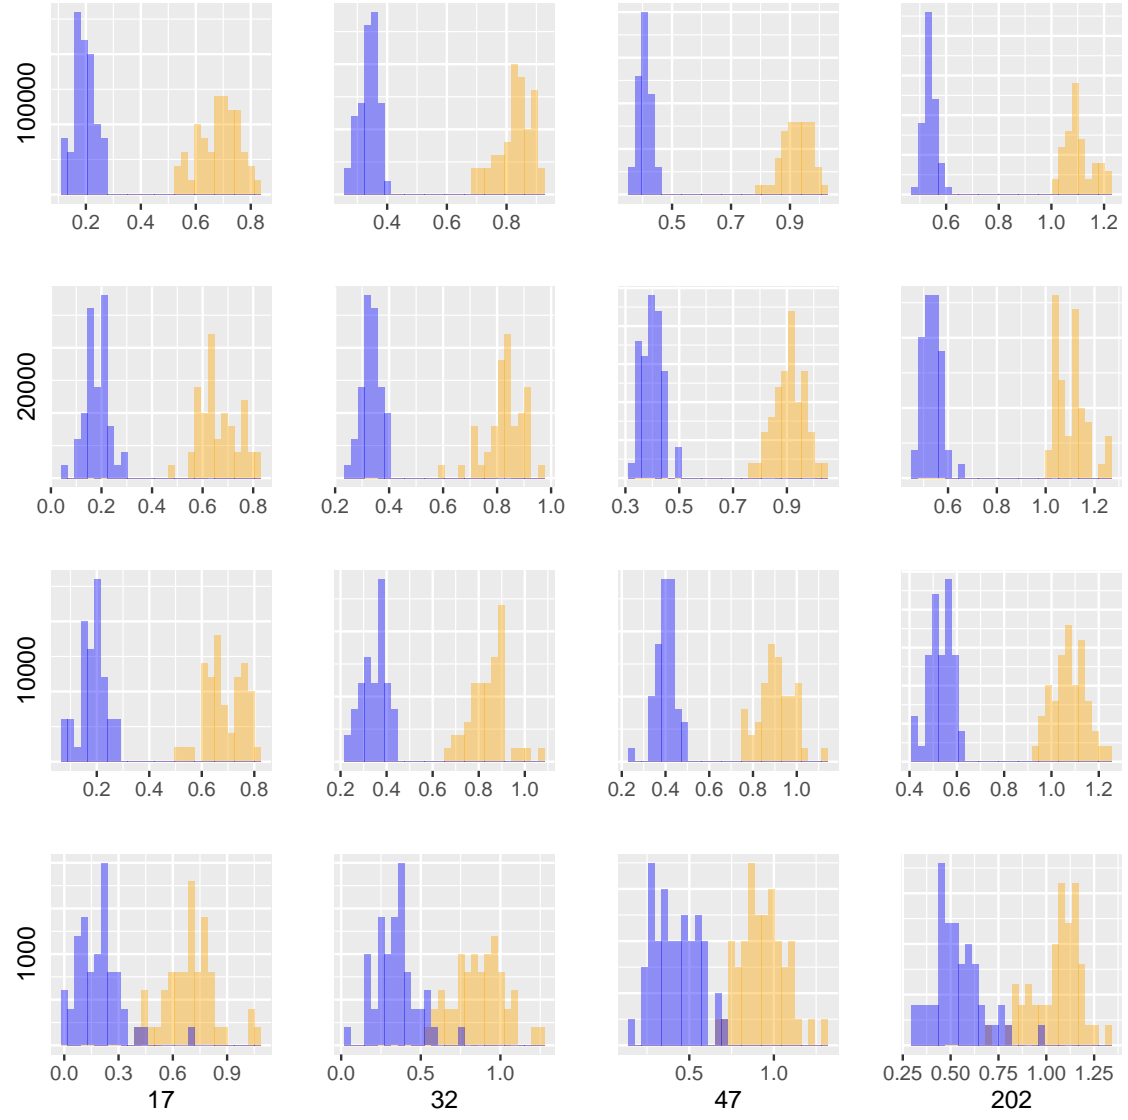

Figure SF11: Similar setting as in figure SF3 but  $C_i$  is between 2% and 25%,  $e = 0.001$ .

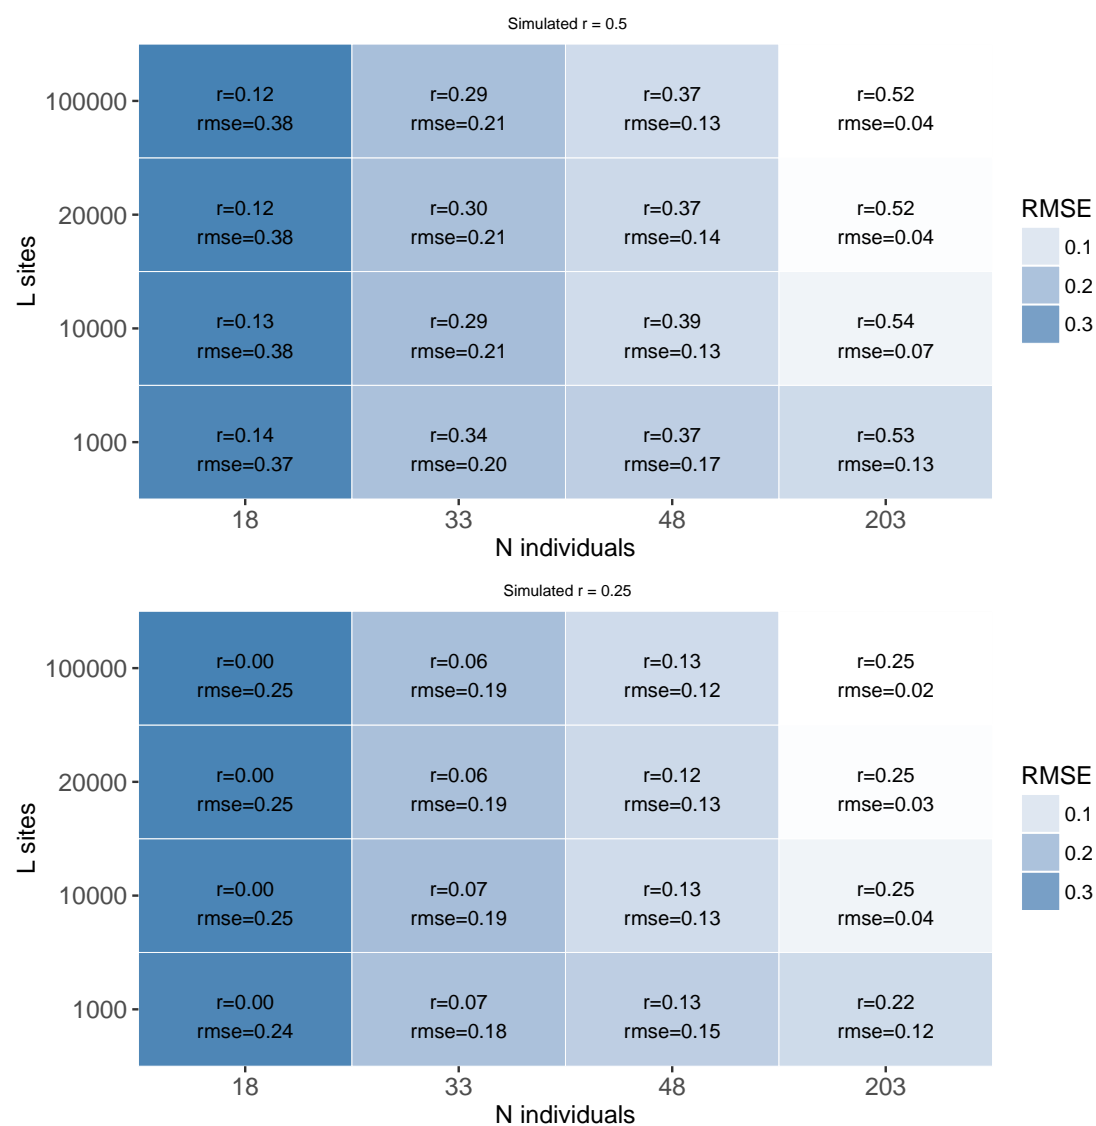

Figure SF12: Similar setting as in figure SF4 but  $C_i$  is between 2% and 25%,  $e = 0.001$ .

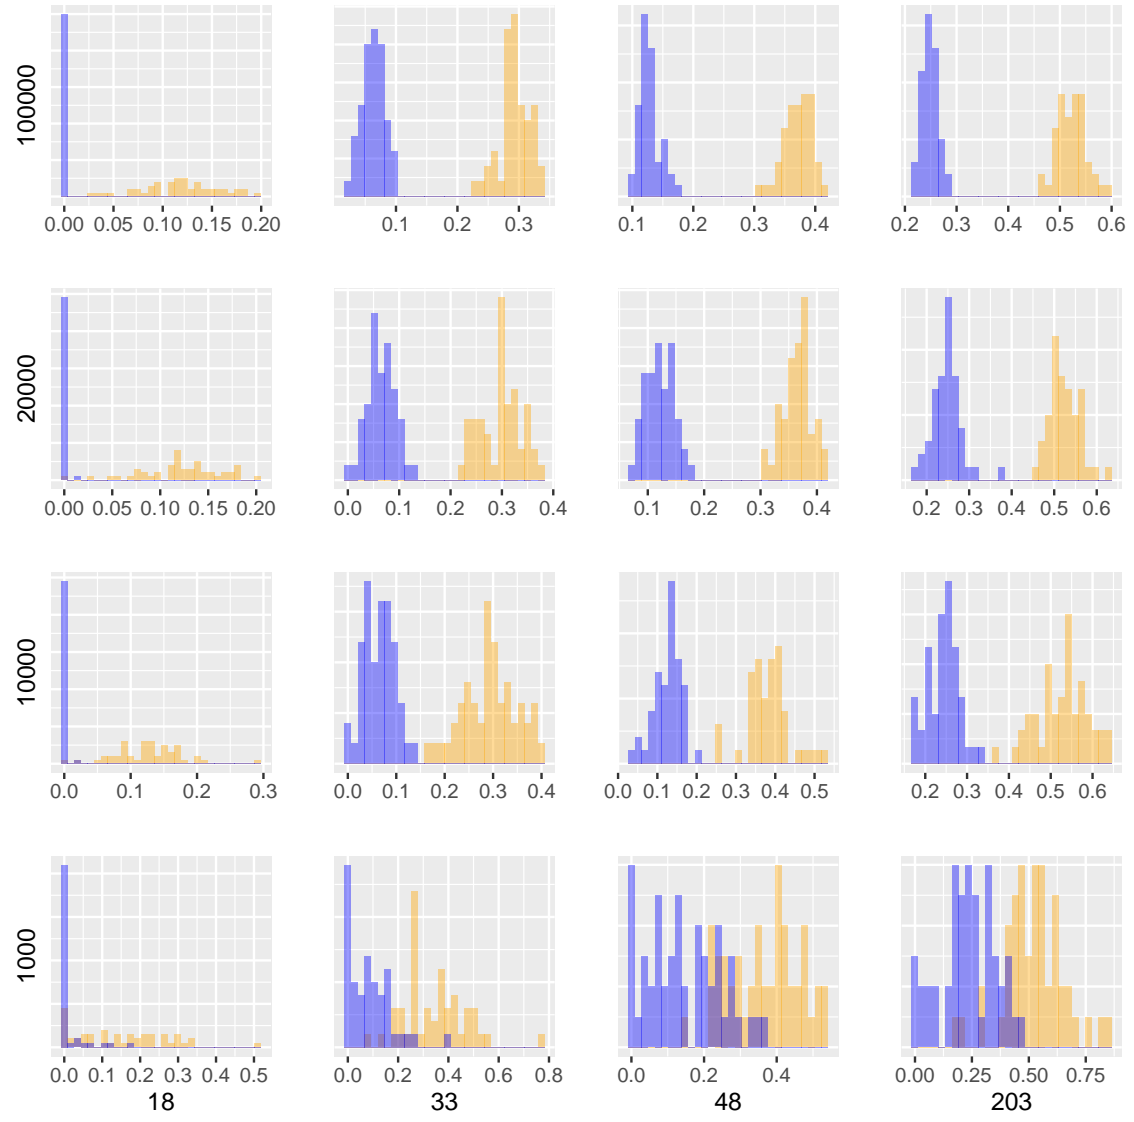

Figure SF13: Similar setting as in figure SF5 but  $C_i$  is between 2% and 25%,  $e = 0.001$ .

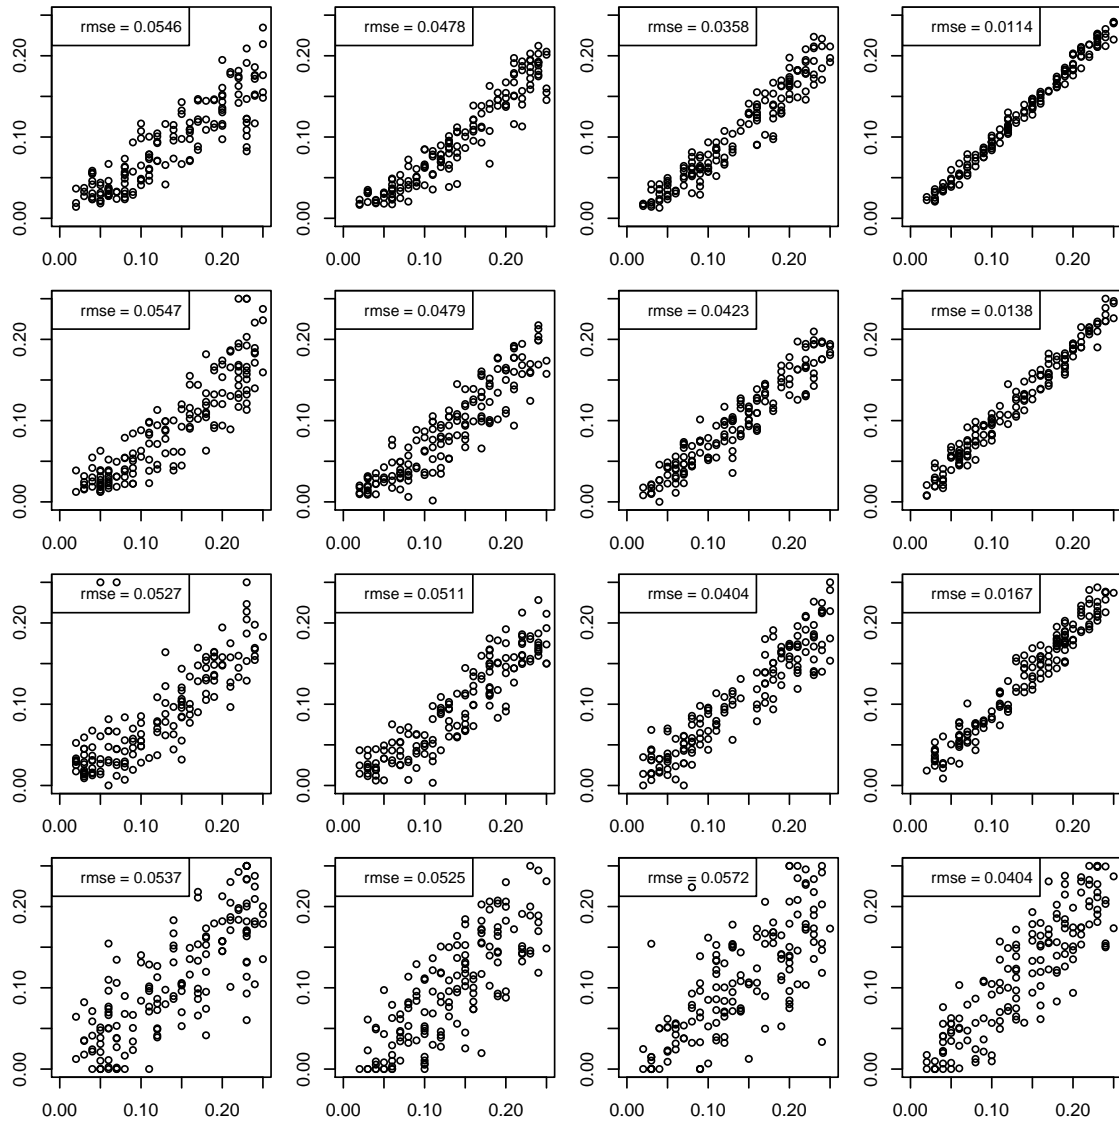

Figure SF14: Similar setting as in figure SF6 but  $C_i$  is between 2% and 25%,  $e = 0.001$ .

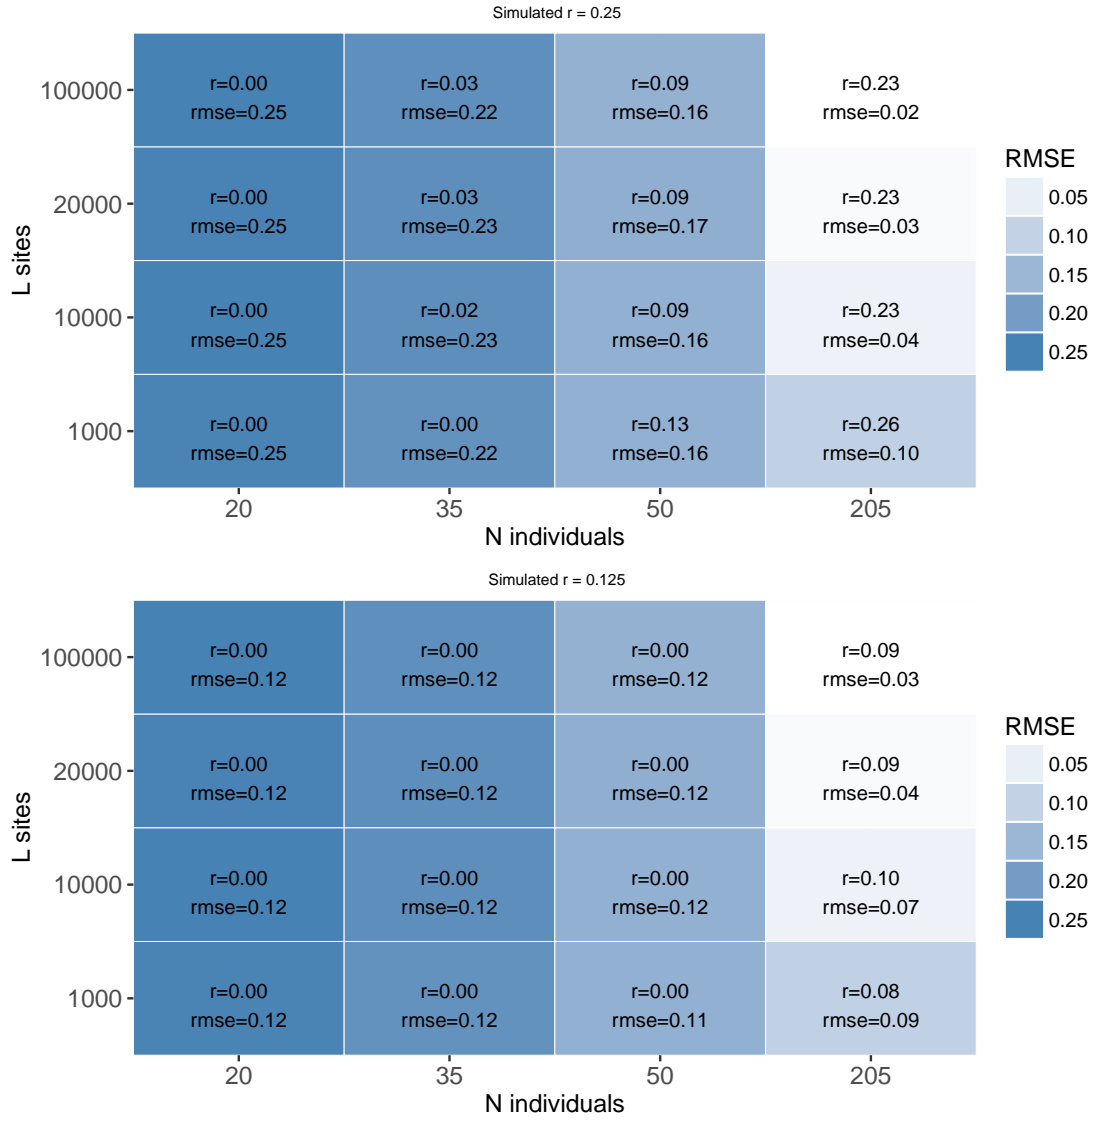

Figure SF15: Similar setting as in figure SF7 but  $C_i$  is between 2% and 25%,  $e = 0.001$ .

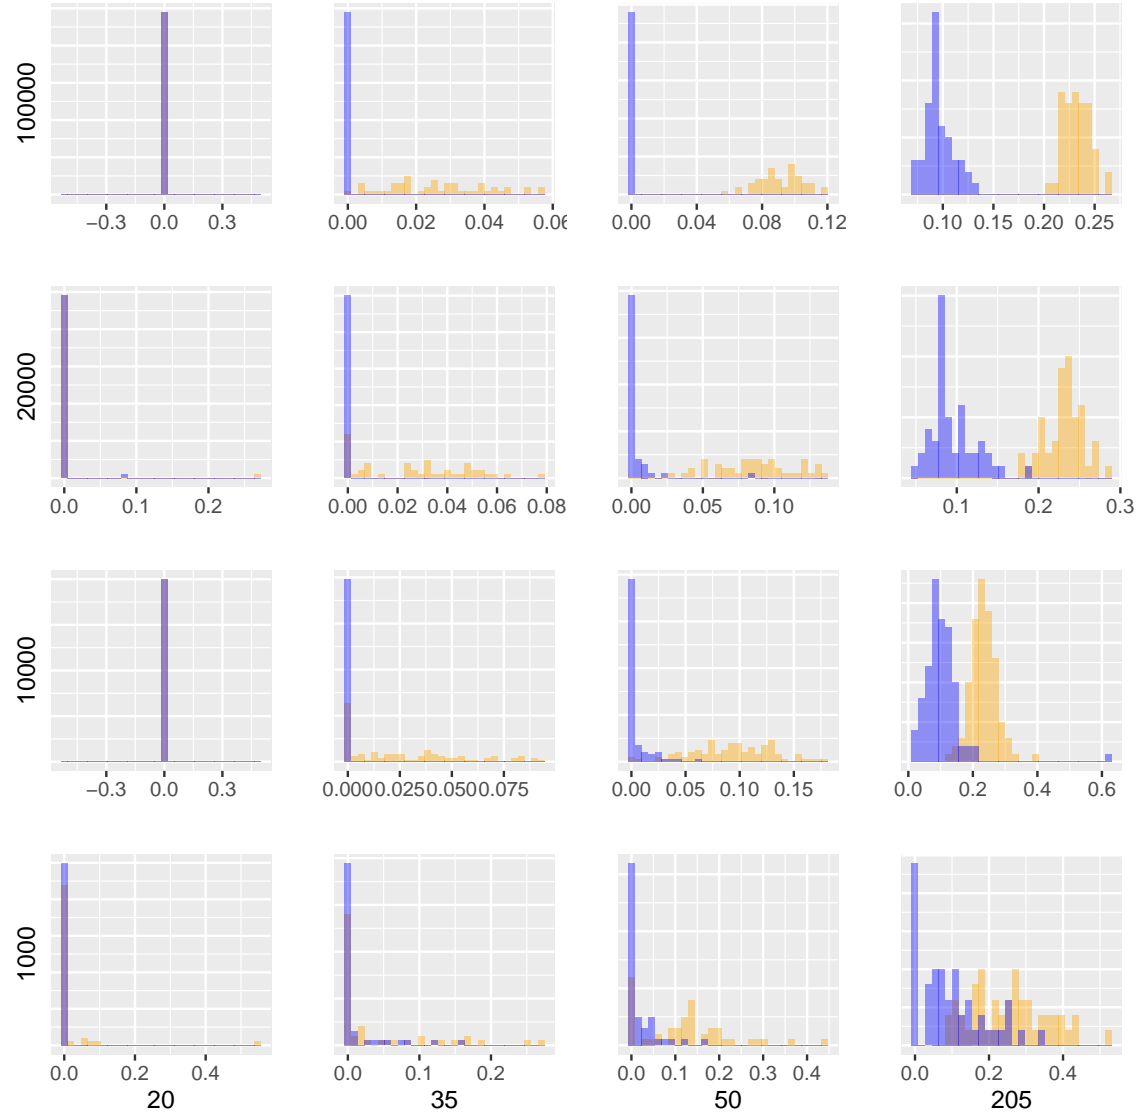

Figure SF16: Similar setting as in figure SF8 but  $C_i$  is between 2% and 25%,  $e = 0.001$ .

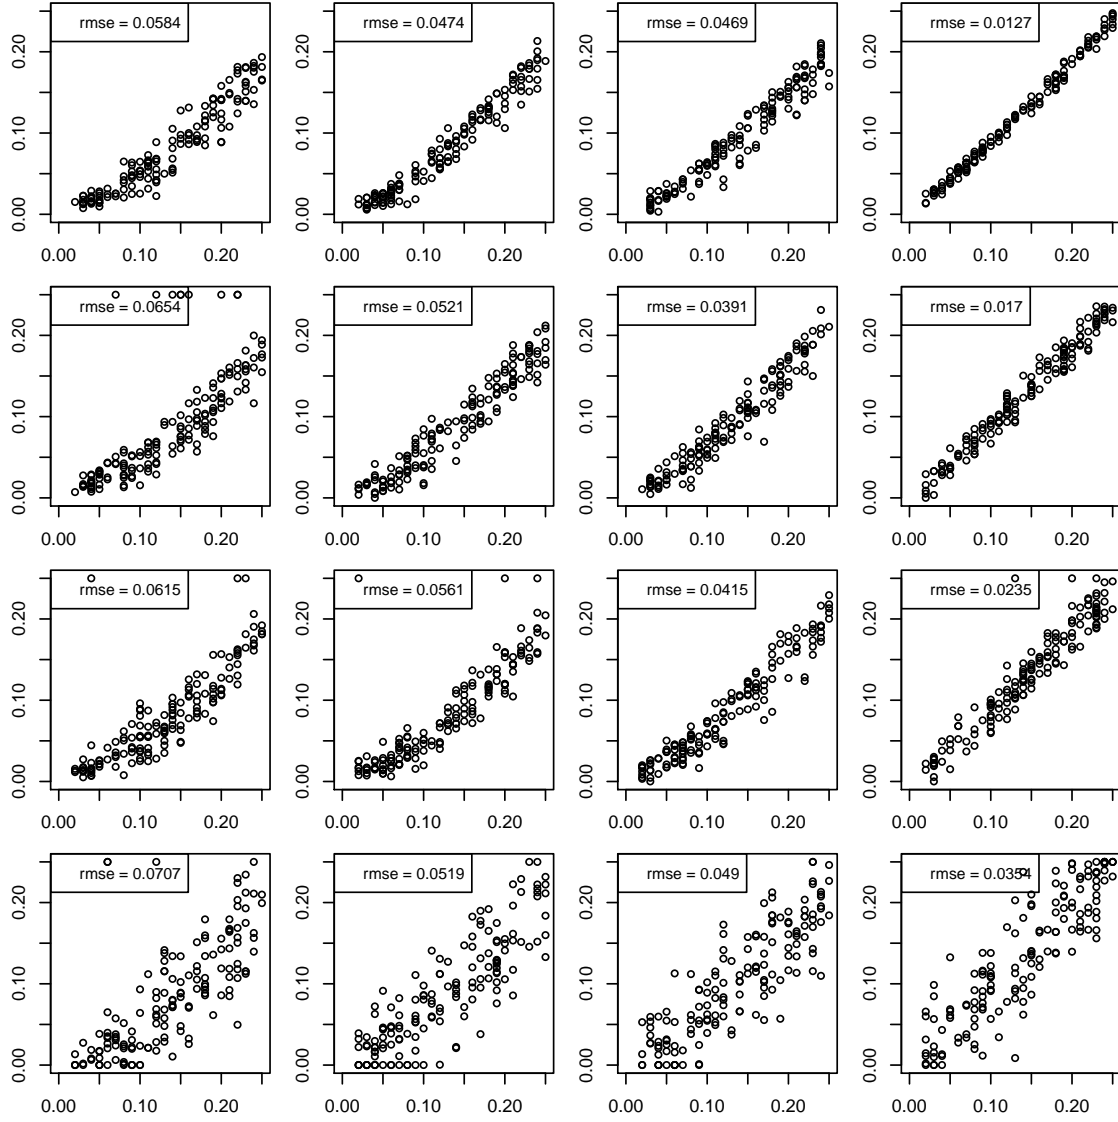

Figure SF17: Similar setting as in figure SF9 but  $C_i$  is between 2% and 25%,  $e = 0.001$ .



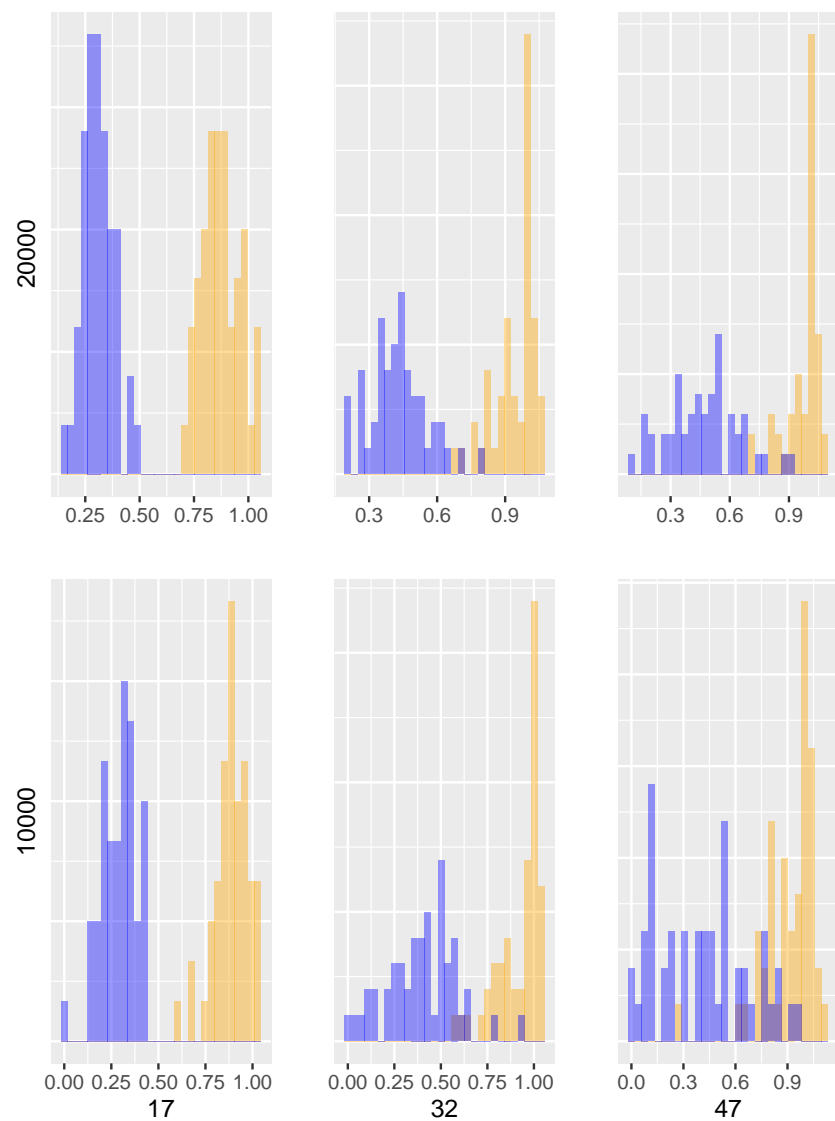

Figure SF18: Each panel represents a different combination of  $N$  (columns) and  $L$  (rows) and shows a histogram for the estimates of simulated relatedness of  $r_s = 1.0$  and  $r_s = 0.5$  over 50 independent datasets for pedigree f1.0. However, at each genomic site read information was available only from a random subset of 5 different individuals (out of a total of  $N$ ).

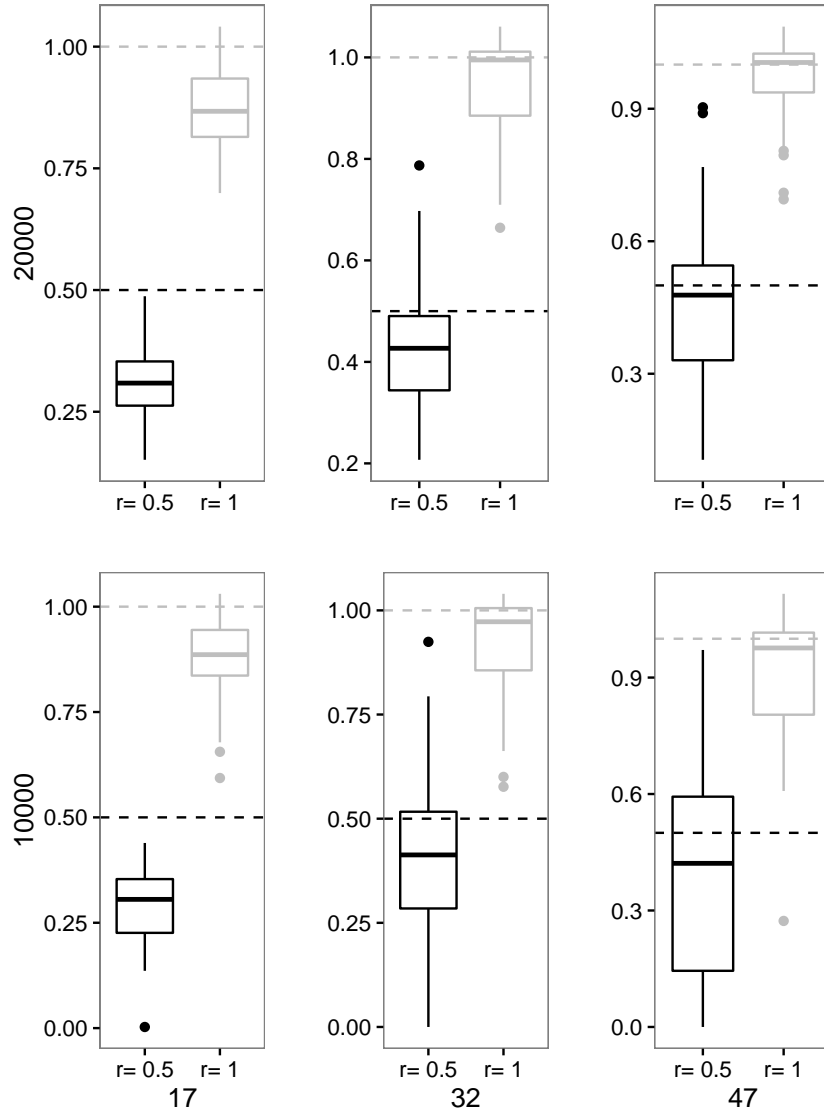

Figure SF19: Each panel represents a different combination of  $N$  (columns) and  $L$  (rows) and shows a boxplot for the estimates of simulated relatedness of  $r_s = 1.0$  and  $r_s = 0.5$  over 50 independent datasets for pedigree f1.0. Dashed horizontal lines denote the simulated values of  $r_s$ . However, at each genomic site read information was available only from a random subset of 5 different individuals (out of a total of  $N$ ).

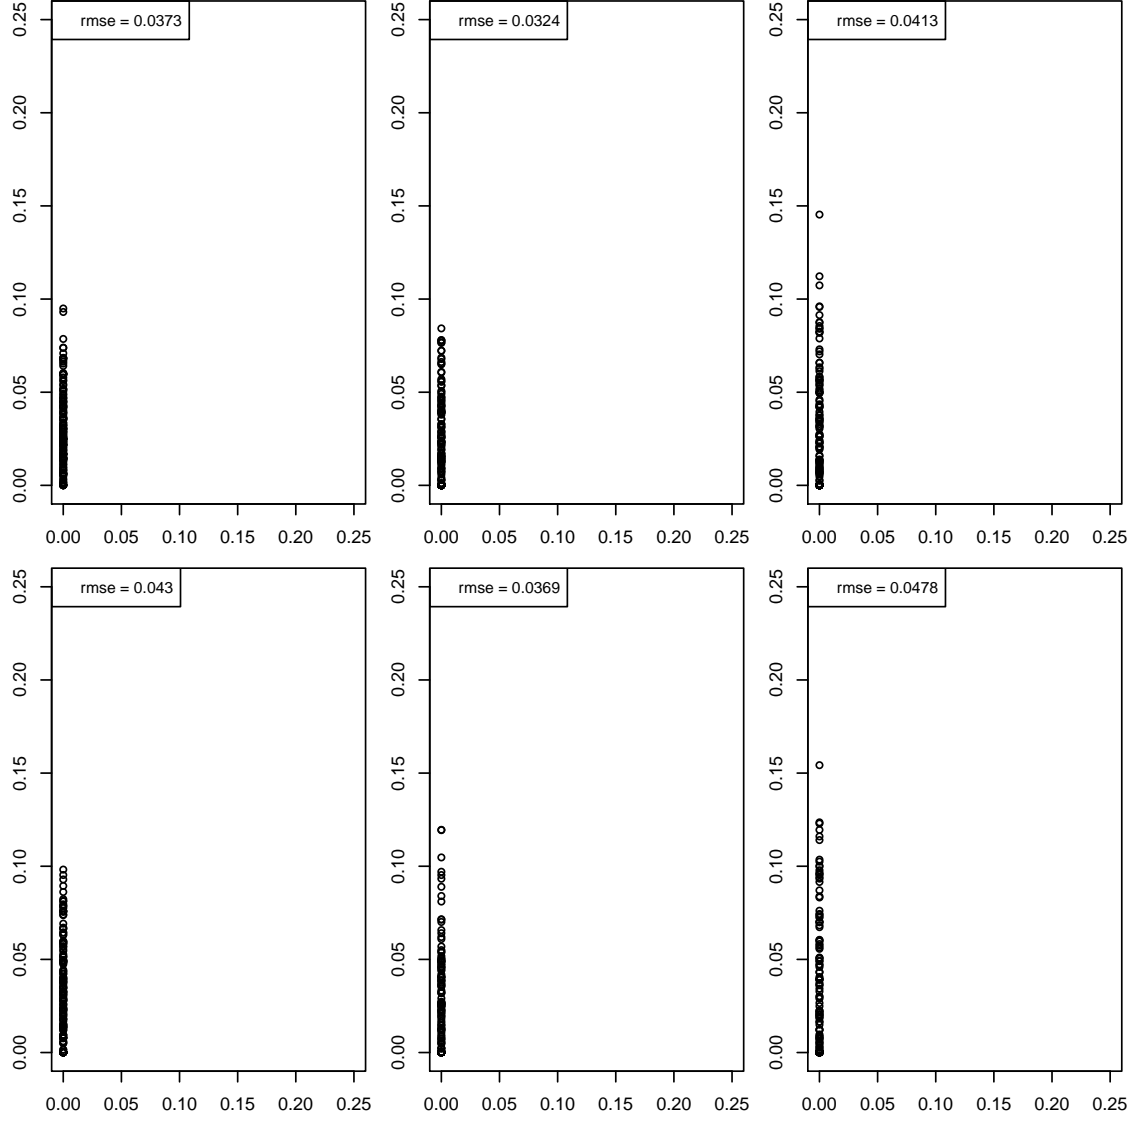

Figure SF20: Each panel represents a different combination of  $N$  (columns) and  $L$  (rows) and shows an x-y plot for estimated (x axis) and simulated (y axis) contamination rates for pedigree f1.0.  $C_i$  was simulated to be 0. However, at each genomic site read information was available only from a random subset of 5 different individuals (out of a total of  $N$ ).

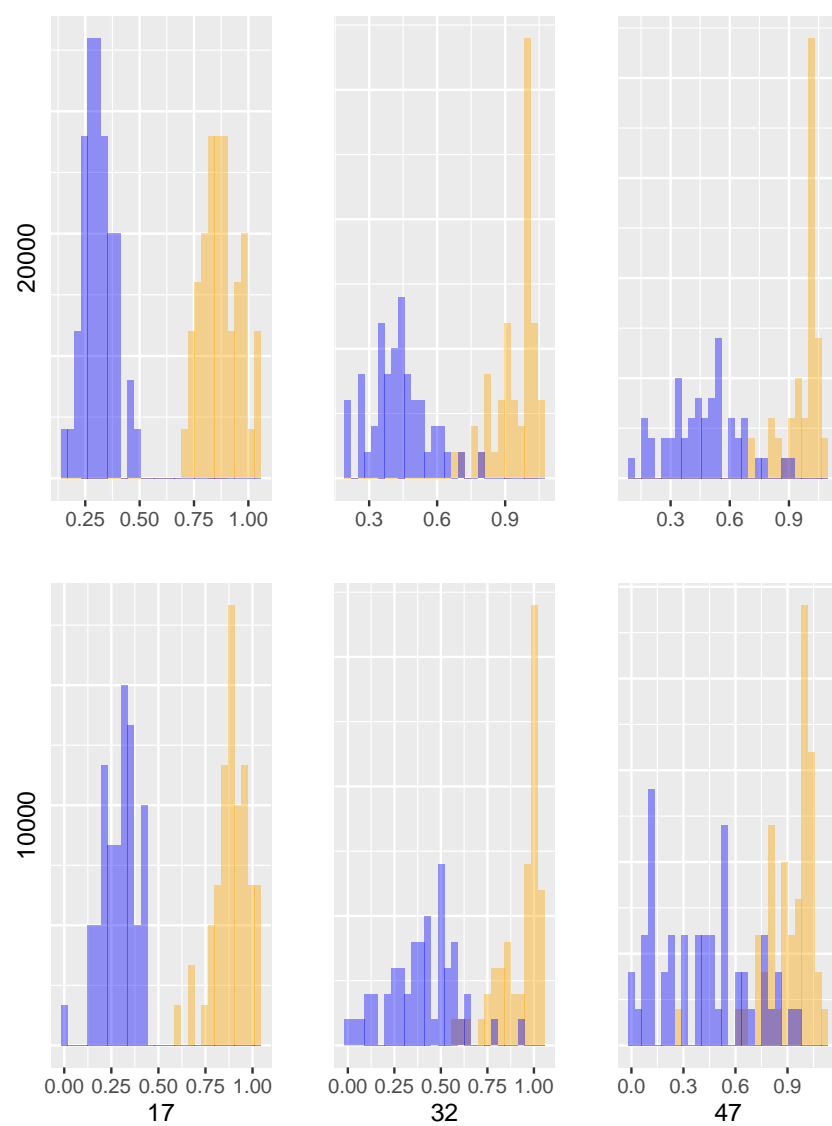

Figure SF21: Similar setting as in figure SF18 but for pedigree 1.1.

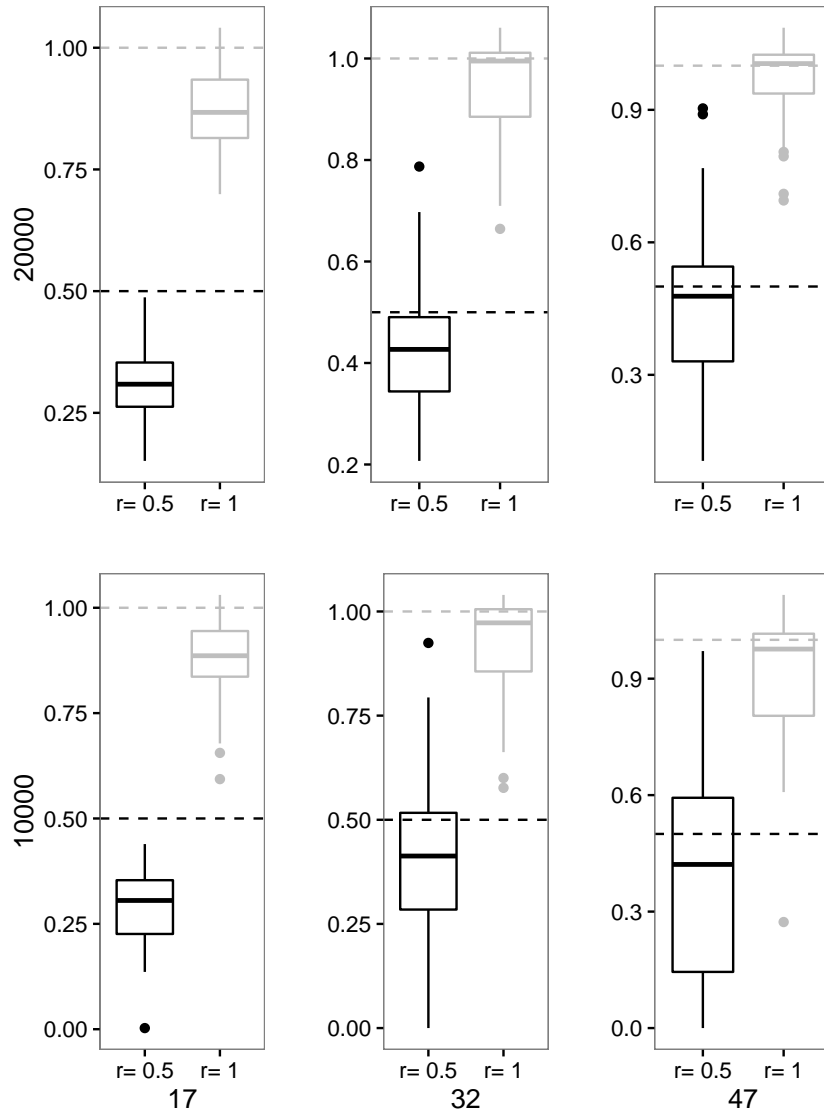

Figure SF22: Similar setting as in figure SF19 but for pedigree 1.1.

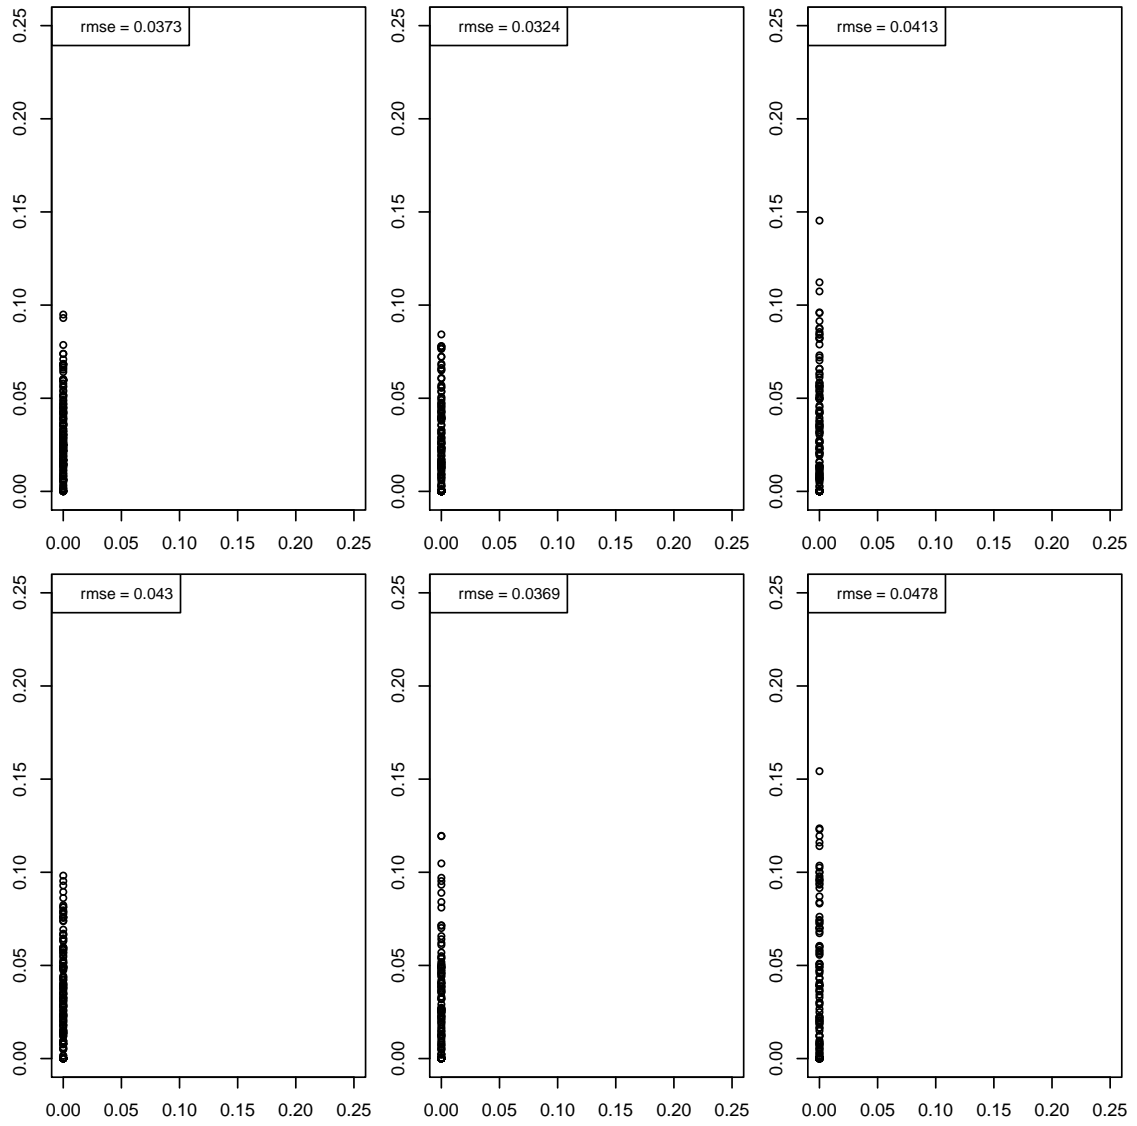

Figure SF23: Similar setting as in figure SF20 but for pedigree 1.1.

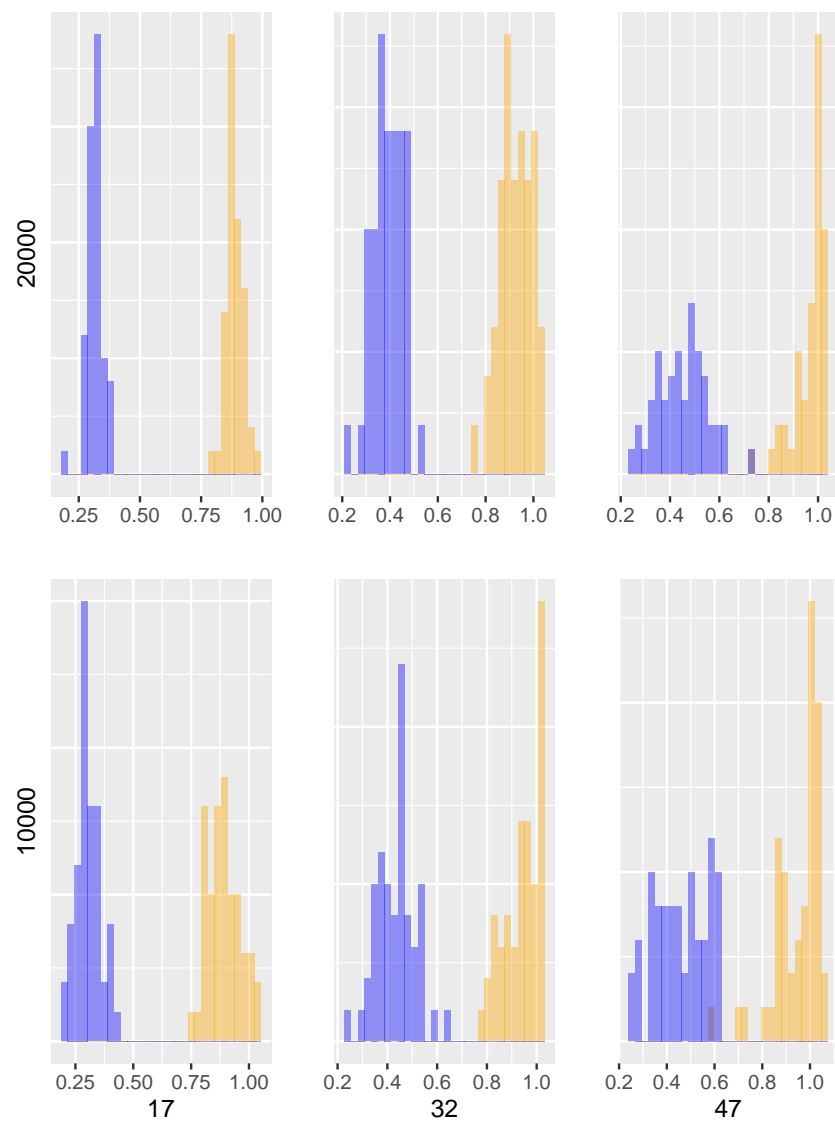

Figure SF24: Each panel represents a different combination of  $N$  (columns) and  $L$  (rows) and shows a histogram for the estimates of simulated relatedness of  $r_s = 1.0$  and  $r_s = 0.5$  over 50 independent datasets for pedigree f1.0. However, at each genomic site read information was available only from a random subset of 10 different individuals (out of a total of  $N$ ).

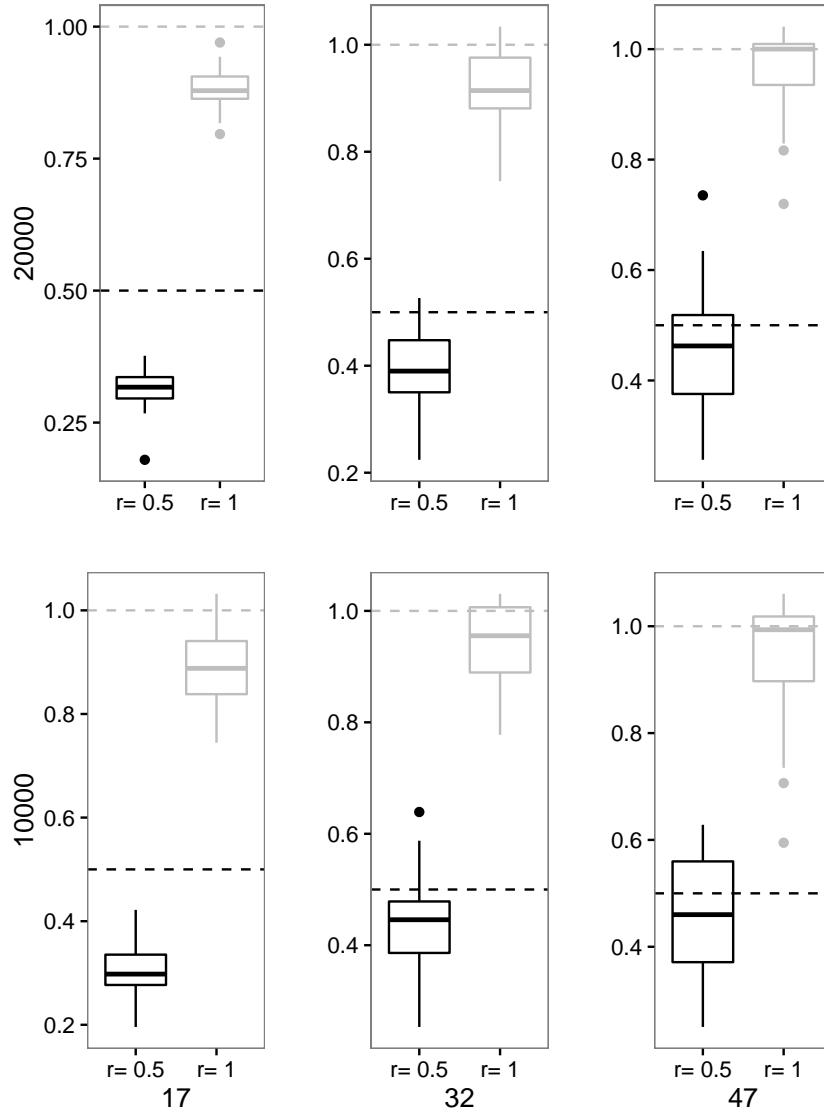

Figure SF25: Each panel represents a different combination of  $N$  (columns) and  $L$  (rows) and shows a boxplot for the estimates of simulated relatedness of  $r_s = 1.0$  and  $r_s = 0.5$  over 50 independent datasets for pedigree f1.0. Dashed horizontal lines denote the simulated values of  $r_s$ . However, at each genomic site read information was available only from a random subset of 10 different individuals (out of a total of  $N$ ).



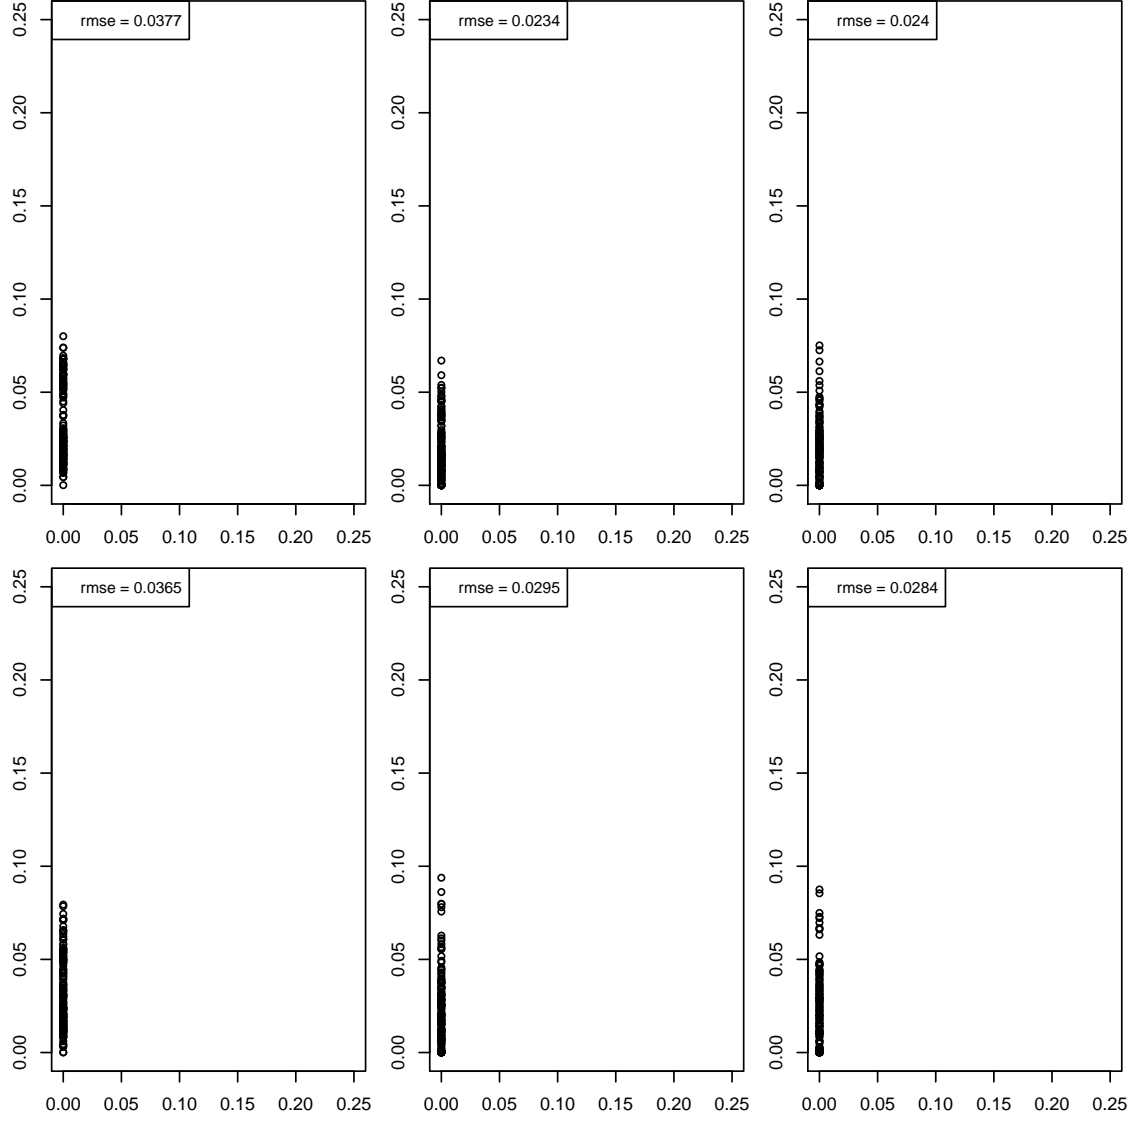

Figure SF26: Each panel represents a different combination of N (columns) and L (rows) and shows an x-y plot for estimated (x axis) and simulated (y axis) contamination rates for pedigree f1.0.  $C_i$  was simulated to be 0. However, at each genomic site read information was available only from a random subset of 10 different individuals (out of a total of N).

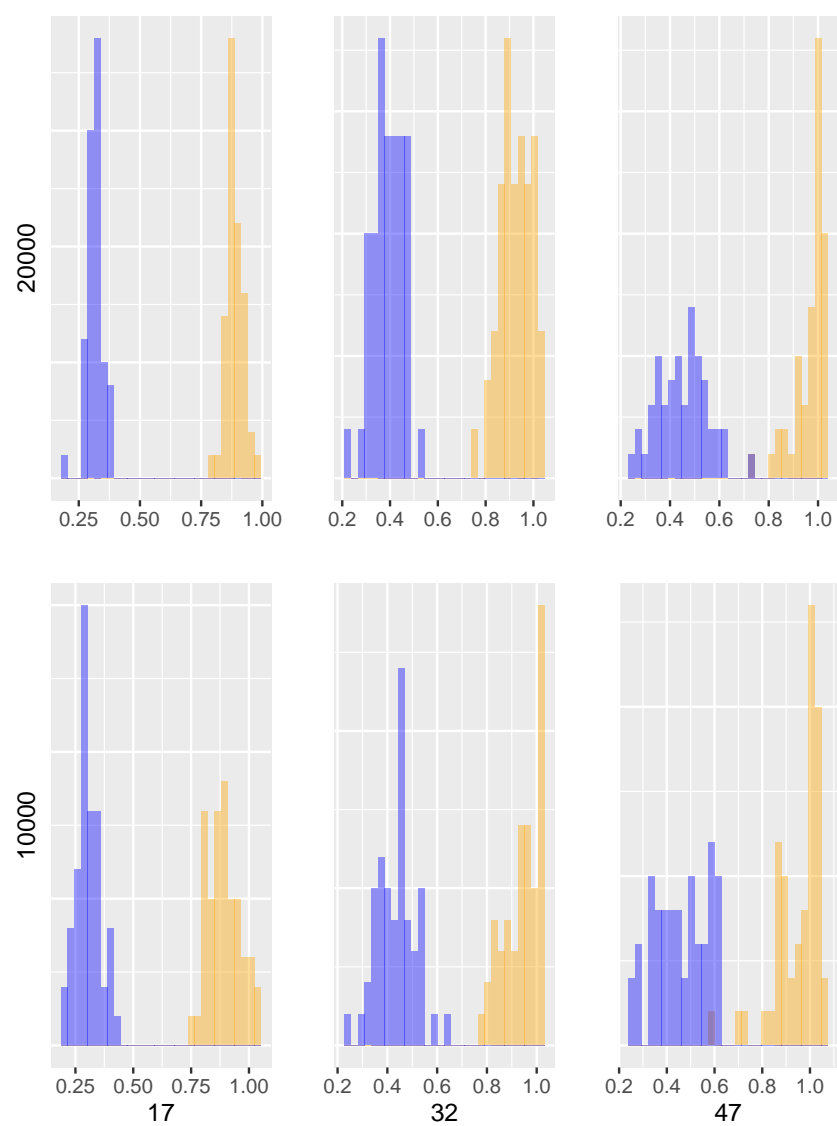

Figure SF27: Similar setting as in figure SF24 but for pedigree 1.1.

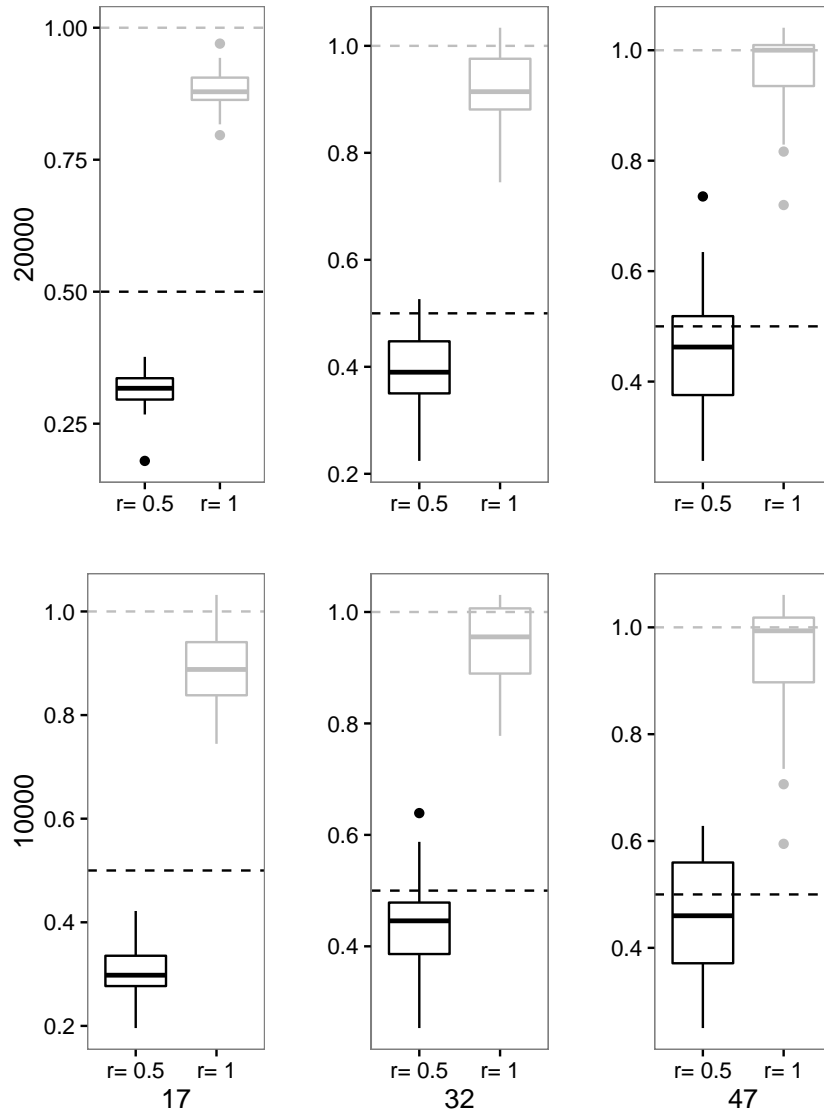

Figure SF28: Similar setting as in figure SF25 but for pedigree 1.1.

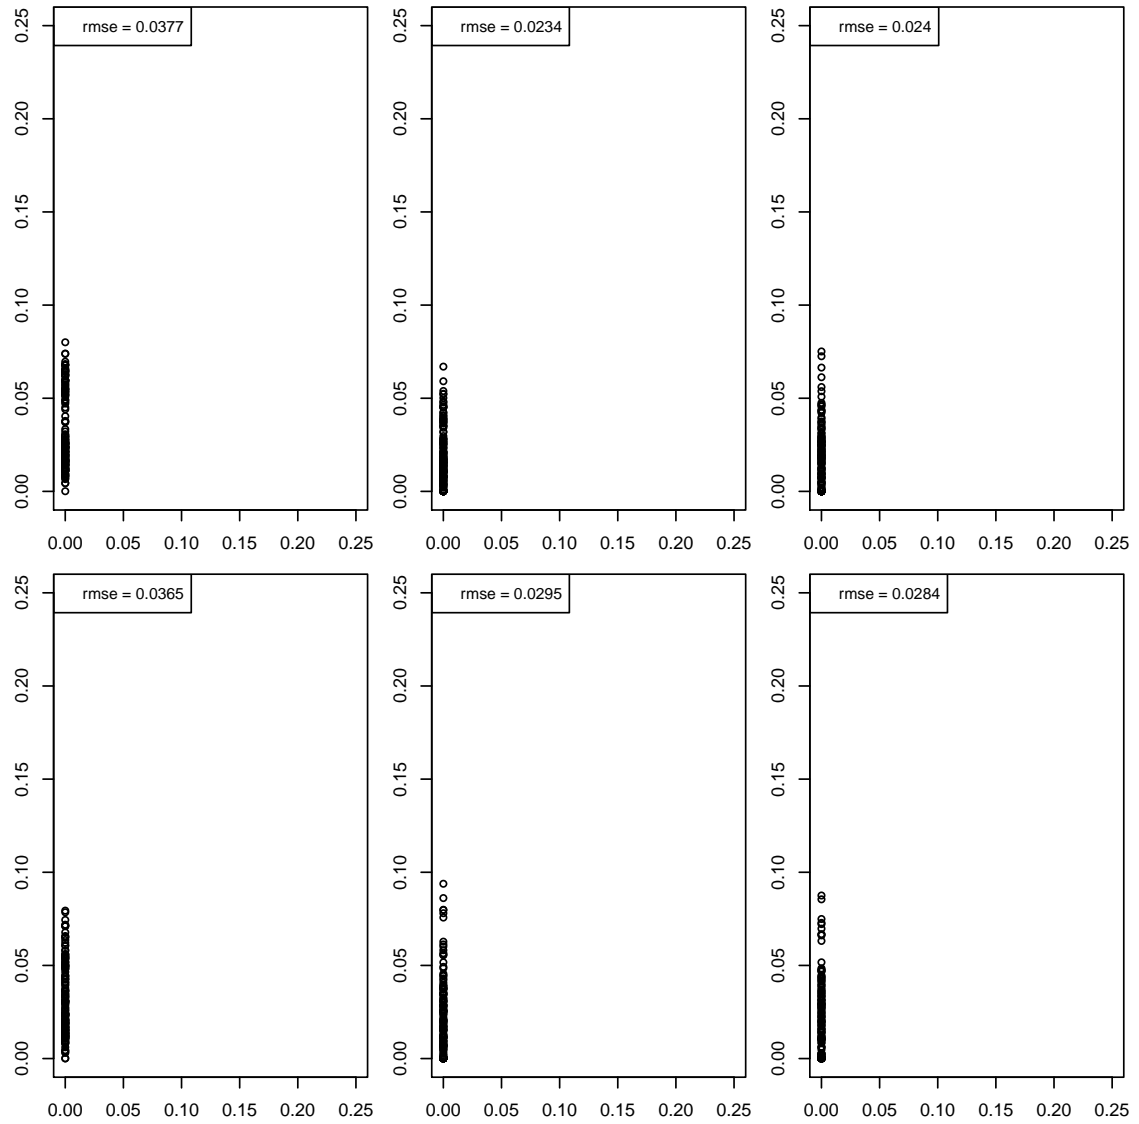

Figure SF29: Similar setting as in figure SF26 but for pedigree *1.1*.

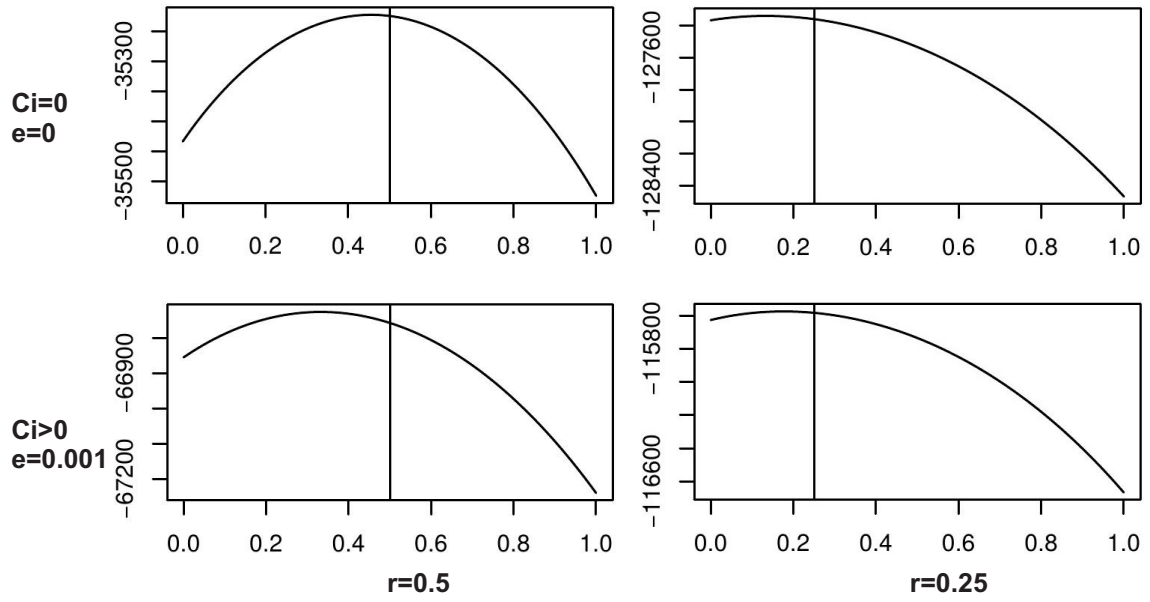

Figure SF30: This figure shows conditional likelihoods for results based on  $r_s = 0.25$  and  $r_s = 0.5$  under the presence and absence of contamination rate and sequencing error.
